# Supplementary material for: Automated control of mechanical ventilation during general anaesthesia: study protocol of a bicentric observational study (AVAS)
Source: PubMed Central journal article supplement — BMJ Open. 2017 May 10;7(5):e014742. doi: 10.1136/bmjopen-2016-014742 (PMC5566603; doi:10.1136/bmjopen-2016-014742), 2017-05-10
Supplement: bmjopen-2016-014742.draft_revisions.pdf [file bmjopen-2016-014742.draft_revisions.pdf]

# BMJ Open

## Automated control of mechanical ventilation during general anesthesia – study protocol of a bicentric observational study (AVAS study)

|                                 |                                                                                                                                                                                                                                                                                                                                                                                                                                                                                                                                                                                                                                                                                                                                                                                          |
|---------------------------------|------------------------------------------------------------------------------------------------------------------------------------------------------------------------------------------------------------------------------------------------------------------------------------------------------------------------------------------------------------------------------------------------------------------------------------------------------------------------------------------------------------------------------------------------------------------------------------------------------------------------------------------------------------------------------------------------------------------------------------------------------------------------------------------|
| Journal:                        | <i>BMJ Open</i>                                                                                                                                                                                                                                                                                                                                                                                                                                                                                                                                                                                                                                                                                                                                                                          |
| Manuscript ID                   | bmjopen-2016-014742                                                                                                                                                                                                                                                                                                                                                                                                                                                                                                                                                                                                                                                                                                                                                                      |
| Article Type:                   | Protocol                                                                                                                                                                                                                                                                                                                                                                                                                                                                                                                                                                                                                                                                                                                                                                                 |
| Date Submitted by the Author:   | 17-Oct-2016                                                                                                                                                                                                                                                                                                                                                                                                                                                                                                                                                                                                                                                                                                                                                                              |
| Complete List of Authors:       | Schädler, Dirk; University Medical Center Schleswig-Holstein, Campus Kiel, Department of Anesthesiology and Intensive Care Medicine<br>Miestinger, Georg; University Hospital St. Pölten, Department of Anesthesiology and Intensive Care Medicine<br>Becher, Tobias; University Medical Center Schleswig-Holstein, Campus Kiel, Department of Anesthesiology and Intensive Care Medicine<br>Frerichs, Inéz; University Medical Center Schleswig-Holstein, Campus Kiel, Department of Anesthesiology and Intensive Care Medicine<br>Weiler, Norbert; University Medical Center Schleswig-Holstein, Campus Kiel, Department of Anesthesiology and Intensive Care Medicine<br>Hörmann, Christoph; University Hospital St. Pölten, Department of Anesthesiology and Intensive Care Medicine |
| <b>Primary Subject Heading</b>: | Anaesthesia                                                                                                                                                                                                                                                                                                                                                                                                                                                                                                                                                                                                                                                                                                                                                                              |
| Secondary Subject Heading:      | Respiratory medicine, Surgery, Patient-centred medicine                                                                                                                                                                                                                                                                                                                                                                                                                                                                                                                                                                                                                                                                                                                                  |
| Keywords:                       | Adult anaesthesia < ANAESTHETICS, Adult surgery < SURGERY, Clinical trials < THERAPEUTICS                                                                                                                                                                                                                                                                                                                                                                                                                                                                                                                                                                                                                                                                                                |
|                                 |                                                                                                                                                                                                                                                                                                                                                                                                                                                                                                                                                                                                                                                                                                                                                                                          |

SCHOLARONE™  
Manuscripts

# Automated control of mechanical ventilation during general anesthesia – study protocol of a bicentric observational study (AVAS study)

---

Dirk Schädler<sup>1\*</sup> MD, dirk.schaedler@uksh.de

Georg Miestinger<sup>2</sup> MD, georg.miestinger@stpoelten.lknoe.at

Tobias Becher<sup>1</sup> MD, tobias.becher@uksh.de

Inéz Frerichs<sup>1</sup> MD, inez.frerichs@uksh.de

Norbert Weiler<sup>1</sup> MD, norbert.weiler@uksh.de

Christoph Hörmann<sup>2</sup> MD, christoph.hoermann@stpoelten.lknoe.at

<sup>1</sup>Department of Anesthesiology and Intensive Care Medicine, University Medical Center Schleswig-Holstein, Campus Kiel, Arnold-Heller-Straße 3, Haus 12, 24105 Kiel, Germany.

<sup>2</sup>Department of Anesthesiology and Intensive Care Medicine, University Hospital St. Pölten, Propst-Führer-Straße 4, St. Pölten A-3100

\*Corresponding author

## Abstract

**Introduction:** Automated control of mechanical ventilation during general anesthesia is not common. A novel system for automated control of most of the ventilator settings was designed and is available on an anesthesia machine. The system is designed to support spontaneous breathing activity by decreasing mechanical breathing frequency and by switching from controlled to assisted ventilation immediately after its detection.

**Methods and analysis:** The AVAS study is an international investigator-initiated bicentric observational study designed to examine safety and efficacy of the system during general anesthesia. The system controls mechanical breathing frequency, inspiratory pressure, pressure support, inspiratory time and trigger sensitivity with the aim to keep a patient stable in user adoptable target zones. Adult patients who are classified as American Society of Anesthesiologists physical status I, II or III, scheduled for elective surgery of the upper or lower limb or for peripheral vascular surgery in general anesthesia and who gave written consent for study participation are eligible for study inclusion. Primary endpoint of the study is the frequency of specifically defined adverse events. Secondary endpoints are frequency of normoventilation, hypoventilation and hyperventilation, the time period between switch from controlled ventilation to augmented ventilation, achievement of stable assisted ventilation of the patient, proportion of time within the target zones for tidal volume, end-tidal partial pressure of carbon dioxide as individually set up for each patient by the user, frequency of alarms, frequency distribution of tidal volume, inspiratory pressure, inspiration time, expiration time, end-tidal partial pressure of carbon dioxide and the number of re-intubations.

1  
2  
3 **Ethics and Dissemination:** AVAS will be the first clinical study investigating a novel  
4  
5 automated system for the control of mechanical ventilation on an anesthesia machine. In  
6  
7 case that safety and efficacy are acceptable, a randomized controlled trial comparing the  
8  
9 novel system with the usual practice may be warranted.  
10  
11

12  
13 **Trial registration:** DRKS DRKS00011025, registered 12 October 2016; [clinicaltrials.gov](http://clinicaltrials.gov) ID  
14  
15 **NCT02644005**, registered 30 December 2015  
16

17  
18 **Abstract word count:** 299/350  
19

## 20 21 22 23 **Strengths and limitations of this study**

- 24  
25 • This will be the first clinical study investigating a novel automated system for the  
26  
27 automated control of mechanical ventilation on an anesthesia machine.  
28  
29
- 30  
31 • Safety and efficacy of the system as well as feasibility of early assisted ventilation  
32  
33 during general anesthesia in terms of a proof-of-concept approach will be  
34  
35 assessed.  
36  
37

## 38 39 40 **Keywords**

41  
42 Closed-loop-control of mechanical ventilation, knowledge based system, spontaneous  
43  
44 breathing, general anesthesia, automatic control of artificial ventilation.  
45  
46  
47  
48  
49  
50  
51  
52  
53  
54  
55  
56  
57  
58  
59  
60

## Introduction

Automated control of mechanical ventilation is a technology which is commonly applied in ventilators used in the intensive care unit (ICU). Different systems (e. g. Intellivent - Adaptive Support Ventilation [1], SmartCare/PS [2], Neurally Adjusted Ventilator Assist [3]) were developed and commercially distributed. Most of the systems are available for many years and were studied extensively [1 4-19].

During general anesthesia, the physician has to set-up the same ventilator settings as on an intensive care ventilator. However, an automated control of ventilator settings is currently not available on anesthesia machines. A novel system called Smart Vent Control (SVC) was designed to automatically control the following ventilator settings:

- Mechanical breathing frequency ( $f_{\text{mech}}$ )
- Inspiratory pressure ( $P_{\text{insp}}$ )
- Pressure support (PS)
- Inspiratory time ( $T_i$ )
- Trigger sensitivity ( $T_s$ ).

SVC adjusts the ventilator settings with the aim to keep a patient stable in a target zone (TZ). Numerous predefined TZs exist that can be set according to the current therapeutic situation. All TZs are adoptable by the user for each individual patient and consist of upper and lower limits for tidal volume ( $V_T$ ) and for the partial pressure of end-tidal carbon dioxide ( $P_{\text{etCO}_2}$ ). Based on these limits, the system classifies the current quality of ventilation, called Classification of Ventilation (CoV), and derives new ventilator settings accordingly. This is done every 15 seconds. The physician always has the opportunity to change the ventilator settings manually or to stop the system. If SVC detects spontaneous breathing activity, the mechanical breathing frequency is decreased automatically with the aim to increase the

1  
2  
3 portion of spontaneous ventilation adequately if “augmented ventilation” is activated. In this  
4  
5 case, if sufficient spontaneous breathing activity is detected, SVC will automatically change  
6  
7 the ventilator mode from controlled mechanical ventilation (pressure controlled ventilation,  
8  
9 PCV) to assisted ventilation (pressure support ventilation, PSV). The patient is continuously  
10  
11 monitored for possible instabilities. Lastly, the physician is supported in the recovery process  
12  
13 of general anesthesia by supporting the induction of spontaneous breathing and by checking  
14  
15 whether the respiratory drive of the patient is sufficient for extubation.  
16  
17  
18  
19

20 SVC is available as a software option on Zeus Infinity Empowered anesthesia machines  
21  
22 (Drägerwerk AG & Co. KGaA, Lübeck, Germany) and is approved as a medical product  
23  
24 according to 93/42/European Economic Community (EEC). This medical device has not been  
25  
26 investigated in a clinical trial yet. In this paper we describe the design of the first clinical  
27  
28 study that will be performed with SVC during general anesthesia.  
29  
30  
31  
32  
33

## 34 **Methods and Analysis**

35  
36 The “Automated control of mechanical ventilation during general anesthesia study (AVAS  
37  
38 study) is an international investigator-initiated bicentric observational study investigating  
39  
40 the application of SVC during general anesthesia. The study was approved by the Ethics  
41  
42 Committee of the Medical Faculty of the Christian Albrechts University Kiel, Germany  
43  
44 (A154/14) by the Ethics Committee of the county Niederösterreich (GS-1-EK-3/118-2016)  
45  
46 and is  
47  
48  
49

50  
51 registered at clinicaltrials.gov (NCT02644005). The main objective of this study is to  
52  
53 describe the application of SVC and to assess its safety and efficacy.  
54  
55  
56  
57  
58  
59  
60

## Patient screening

Patients will be screened during the premedication visits for possible study inclusion. Possible study candidates will be informed about the study in detail and asked to give consent for study participation.

## Inclusion and exclusion criteria

The following inclusion criteria will be used:

- Planned elective surgery of the upper limb, lower limb or peripheral vascular surgery in general anesthesia
- Patient is classified as American Society of Anesthesiologists (ASA) physical status I, II or III
- Age  $\geq$  18 years
- Written consent of the patient for study participation.

Patients will be excluded when meeting one or more of the following exclusion criteria:

- Mild, moderate or severe acute respiratory distress syndrome (ARDS) [20]
- Known chronic obstructive pulmonary disease Gold stage III or higher [21]
- Patient is pregnant
- Two or more of the following organ failures
  - Mild, moderate or severe ARDS
  - Hemodynamic instability defined as systolic blood pressure  $<$  90 mm Hg, mean arterial pressure  $<$  70 mmHg or administration of any vasoactive drugs

- Acute renal failure defined as oliguria, i.e. urine output < 0.5 ml/kg/h for at least 2 hours despite of adequate management or creatinine increase > 0.5 mg/dl
- Cerebral failure: loss of consciousness or encephalopathy.

## Study procedure

All patients will be ventilated with SVC. Since SVC does not control the inspired fraction of oxygen ( $F_{iO_2}$ ) and positive end-expiratory pressure (PEEP), the user will have to set up both of these settings during the whole general anesthesia with the aim to reach a peripheral saturation of oxygen ( $SpO_2$ ) greater than 95%.

Anesthesia will be performed by a physician of the study team who has been trained in using SVC. The physician can overrule or stop the system at any time if this is necessary for patient safety. Reasons for stopping or overruling will be documented.

Two different study scenarios are possible according to the surgical procedure (Figure 1):

i) *Early spontaneous breathing*: Patient is allowed to breathe spontaneously immediately after induction of the general anesthesia, ii) *Controlled mechanical ventilation*: Patient will be ventilated in a controlled ventilation mode as long as needed for the surgical procedure. Then, spontaneous breathing will be allowed as soon as possible.

The study will proceed as follows:

### I. Early spontaneous breathing

- Check of the anesthesia machine
- Setting of the individual alarm settings
- Setting of SVC:



- level of ventilation, airway and lung mechanics as clinically indicated
- ventilation regime: augmented ventilation
- Preoxygenation of the patient with an  $F_{iO_2} = 1$  for at least 3 minutes
- Induction of the general anesthesia with an opioid (remifentanil, fentanyl or sufentanil) and propofol
- Hand bagging
- Insertion of the laryngeal mask or endotracheal tube
- Hand bagging while checking for significant leakage (laryngeal mask) and correction if needed
- Continuous infusion of remifentanil and propofol or administration of sevoflurane
- Start of SVC
- Insertion and position check of a gastric tube (routine)
- Arterial blood gas analysis 15 minutes after the beginning of the surgical procedure (routine)
- Stop of the continuous infusion of remifentanil and propofol (or sevoflurane) immediately after the end of the surgical procedure and switch SVC ventilation regime to "Recovery"

## II. Controlled mechanical ventilation

- Check of the anesthesia machine
- Setting of the individual alarm settings
- Setting of SVC
  - level of ventilation, airway and lung mechanics as clinically indicated
  - ventilation regime: controlled ventilation
- Preoxygenation of the patient with an  $F_{iO_2} = 1$  for at least 3 minutes

- Induction of the general anaesthesia with an opioid (remifentanil, fentanyl or sufentanil) and propofol
- Hand bagging
- Administration of muscle relaxant agent (rocuronium, cis-atracurium or succinylcholine) if needed
- Insertion of the laryngeal mask or endotracheal tube
- Hand bagging while checking for significant leakage and correction if needed
- Continuous infusion of remifentanil and propofol or administration of sevoflurane
- Start of SVC
- Insertion and position check of a gastric tube (routine)
- Arterial blood gas analysis 15 minutes after the begin of the surgical procedure (routine)
- Stepwise decrease of remifentanil and propofol (or sevoflurane) with the aim to allow spontaneous breathing activity and switch the SVC system to “Augmented Ventilation”
- If no spontaneous breaths are detected during 20 minutes, the SVC system will be switched to “Encourage Spontaneous Breathing”
- Stop of the continuous infusion of remifentanil and propofol (or sevoflurane) immediately after the end of the surgical procedure and switch SVC ventilation regime to “Recovery”

## Extubation

Readiness for extubation is given when SVC proposes separation from the ventilator.

Extubation will be performed when the following criteria are satisfied: patient is awake and cooperative, sufficient airway protection or the Glasgow Coma Scale (GCS) >8, no surgical

1  
2  
3 contraindication. After extubation, the patients will be monitored for at least 5 minutes in  
4  
5 the operating room (OR). The study period ends with the initiation of the patients' transfer  
6  
7 from the OR to the recovery room.  
8  
9

## 10 11 **Study Endpoints**

12  
13 Primary endpoint of the study is the frequency of adverse events (AE) defined as follows:  
14

- 15 • Severe hypoventilation defined as minute volume lower than 40 ml/kg predicted  
16  
17 body weight for longer than 5 minutes
- 18 • Apnea for longer than 90 seconds
- 19  
20 • Hyperventilation defined as  $P_{et}CO_2$  lower than 5 mm Hg of the lower target setting  
21  
22 for SVC for longer than 5 minutes
- 23 • Hypoventilation defined as  $P_{et}CO_2$  higher than 5 mm Hg of the upper target setting  
24  
25 for the SVC for longer than 5 minutes
- 26  
27 • Respiratory rate > 35 breaths per minute for longer than 5 minutes
- 28  
29 • Any override or stop of the automated controlled ventilation settings by the  
30  
31 anesthesiologist in charge if the settings are clinically not acceptable. Reasons for  
32  
33 overriding or stopping the system will be noted.  
34  
35  
36  
37  
38  
39  
40  
41

42  
43 Secondary endpoints are:  
44

- 45 • Frequency of normoventilated, hypoventilated and hyperventilated patients. The  
46  
47 responsible anesthesiologist defines a target range for the arterial partial pressure of  
48  
49 carbon dioxide ( $P_aCO_{2\_target}$ ) before the induction of the general anesthesia and sets  
50  
51 the corresponding end-tidal  $CO_2$  range in the automated ventilation system. 15  
52  
53 minutes after the begin of the surgical procedure an arterial blood gas analysis will be  
54  
55 performed and  $P_aCO_2$  will be measured. Then patients will be classified as follows:  
56  
57  
58  
59  
60

- hypoventilated patient:  $P_a\text{CO}_2 > (P_a\text{CO}_{2\_target} + 5 \text{ mm Hg})$
- hyperventilated patient:  $P_a\text{CO}_2 < (P_a\text{CO}_{2\_target} - 5 \text{ mm Hg})$
- normoventilated patient:  $(P_a\text{CO}_{2\_target} - 5 \text{ mm Hg}) \leq P_a\text{CO}_2 \leq P_a\text{CO}_{2\_target} + 5 \text{ mm Hg}$
- Time period between the switch from controlled to augmented ventilation and achievement of stable assisted ventilation of the patient
- Proportion of time within the target zones for  $V_T$  and  $P_{et}\text{CO}_2$  as individually set up for each patient by the user
- Frequency of alarms
- Frequency distribution of  $V_T$ ,  $P_{insp}$ ,  $T_I$ , expiration time and  $P_{et}\text{CO}_2$
- Number of re-intubations

### End-point determination

The end-points of the study are evaluated using the recorded data and the protocolled data of the study team.

### Data recording

After study inclusion the following demographic characteristics will be documented: patients' age, sex, height, weight, date and type of surgery. Beginning with the time of the study period, all available data from the ventilator will be recorded via the MEDIBUS interface. In detail, flow, pressure and expired  $\text{CO}_2$  will be stored every 8 ms ("fast data"), all ventilator settings, measurements and alarms will be stored at least every second ("slow data"). All SVC patient session journal files will be systematically stored. Heart rate,  $\text{SpO}_2$  and arterial blood pressures will be recorded at least every 5 minutes. Esophageal pressure swings will be recorded continuously ("fast data").

## Rules for early termination of the study

During each treatment of a patient in this study, the investigator can stop the study procedure when the ventilator settings controlled by SVC are clinically not appropriate or in case of a technical failure of the SVC system. The study will be terminated if the study procedure is stopped by the investigator (as described above) in 5 consecutive patients.

## Statistical considerations

We estimated a frequency of 3 to 5 % for the adverse events. Therefore, a sample size of  $n=100$  patients seems reasonable. Descriptive statistical analyses (mean  $\pm$  standard deviation, median and 95% confidence interval where appropriate) will be used.

## Ethics and dissemination

In contrast to conventional anesthesia machines, automated control of mechanical ventilation is steadily increasing in ICU ventilators. The commercially available systems cover the control of one ventilator setting, i.e. the pressure support level during weaning (SmartCare/PS)[2]), minute ventilation (mandatory minute ventilation, MMV[22], adaptive support ventilation, ASV [23-26]) or even all ventilatory settings (intellivent-ASV)[1]. SVC provides an automated control of minute ventilation by adapting  $T_I$ ,  $f_{\text{mech}}$ ,  $P_{\text{insp}}$ , and PS and supports spontaneous breathing activity as soon as possible by decreasing  $f_{\text{mech}}$  and by switching between pressure controlled and pressure support ventilation. It has been shown that the suppression of spontaneous breathing activity contributes to ventilator-induced lung injury [27], leads to ventilator-induced diaphragmatic dysfunction [28] and increases the risk of developing pneumonia when increasing ventilation time in ICU patients [29]. It is known that the induction of a general anesthesia leads to a cranial movement of the diaphragm provoking atelectasis [30]. Putensen et al. showed nicely that the early use of

1  
2  
3 assisted ventilation leads to recruitment of atelectatic lung regions and thereby improves  
4  
5 lung mechanics and gas exchange in patients at high risk of developing lung injury [31].  
6  
7  
8 Therefore, an automated system that supports assisted ventilation as early as possible may  
9  
10 have many beneficial effects like decreasing the frequency of pulmonary complications,  
11  
12 decreasing the amount of anesthesia drugs or vasoactive drugs and decreasing recovery  
13  
14 time. However, in this study with the first SVC use in patients, we focus on the safety and  
15  
16 efficacy of the system and assess the feasibility of early assisted ventilation during general  
17  
18 anesthesia in terms of a proof-of-concept approach. In case that safety and efficacy are  
19  
20 acceptable in this study, a randomized controlled trial comparing SVC with the usual practice  
21  
22 may be warranted. As spontaneous breathing may not be acceptable or possible during  
23  
24 some surgical procedures (e. g. neuromuscular blockade needed for the surgical procedure),  
25  
26 we designed two different study scenarios (early spontaneous breathing and controlled  
27  
28 mechanical ventilation).  
29  
30  
31  
32  
33  
34  
35  
36  
37  
38  
39  
40  
41  
42  
43  
44  
45  
46  
47  
48  
49  
50  
51  
52  
53  
54  
55  
56  
57  
58  
59  
60

## References

1. Arnal JM, Wysocki M, Novotni D, et al. Safety and efficacy of a fully closed-loop control ventilation (IntelliVent-ASV(R)) in sedated ICU patients with acute respiratory failure: a prospective randomized crossover study. *Intensive care medicine* 2012;**38**(5):781-7 doi: 10.1007/s00134-012-2548-6[published Online First: Epub Date]].
2. Dojat M, Brochard L, Lemaire F, Harf A. A knowledge-based system for assisted ventilation of patients in intensive care units. *International journal of clinical monitoring and computing* 1992;**9**(4):239-50
3. Sinderby C, Navalesi P, Beck J, et al. Neural control of mechanical ventilation in respiratory failure. *Nature medicine* 1999;**5**(12):1433-6 doi: 10.1038/71012[published Online First: Epub Date]].
4. Burns KEA, Meade MO, Lessard MR, et al. Wean Earlier and Automatically with New Technology (the WEAN Study). A Multicenter, Pilot Randomized Controlled Trial. *American journal of respiratory and critical care medicine* 2013;**187**(11):1203-11 doi: 10.1164/rccm.201206-1026OC[published Online First: Epub Date]].
5. Dongelmans DA, Schultz MJ. Adaptive support ventilation: an inappropriate mechanical ventilation strategy for acute respiratory distress syndrome? *Anesthesiology* 2010;**112**(5):1295; author reply 95-6 doi: 10.1097/ALN.0b013e3181d74f710000542-201005000-00051 [pii][published Online First: Epub Date]].
6. Dongelmans DA, Veelo DP, Bindels A, et al. Determinants of tidal volumes with adaptive support ventilation: a multicenter observational study. *Anesth Analg* 2008;**107**(3):932-7 doi: 10.1213/ane.0b013e31817f1dcf[published Online First: Epub Date]].

- 1  
2  
3 7. Dongelmans DA, Veelo DP, Paulus F, et al. Weaning automation with adaptive support  
4  
5 ventilation: a randomized controlled trial in cardiothoracic surgery patients. *Anesth*  
6  
7 *Analg* 2009;**108**(2):565-71 doi: 108/2/565 [pii]  
8  
9  
10 10.1213/ane.0b013e318190c49f[published Online First: Epub Date]].  
11  
12  
13 8. Hendrix H, Kaiser ME, Yusen RD, Merk J. A randomized trial of automated versus  
14  
15 conventional protocol-driven weaning from mechanical ventilation following  
16  
17 coronary artery bypass surgery. *Eur J Cardiothorac Surg* 2006;**29**(6):957-63  
18  
19  
20 9. Holt SJ, Sanders RC, Thurman TL, Heulitt MJ. An evaluation of Automode, a computer-  
21  
22 controlled ventilator mode, with the Siemens Servo 300A ventilator, using a porcine  
23  
24 model. *Respir Care* 2001;**46**(1):26-36  
25  
26  
27 10. Iotti GA, Polito A, Belliato M, et al. Adaptive support ventilation versus conventional  
28  
29 ventilation for total ventilatory support in acute respiratory failure. *Intensive care*  
30  
31 *medicine* 2010 doi: 10.1007/s00134-010-1917-2[published Online First: Epub Date]].  
32  
33  
34 11. Laubscher TP, Heinrichs W, Weiler N, Hartmann G, Brunner JX. An adaptive lung  
35  
36 ventilation controller. *IEEE Trans Biomed Eng* 1994;**41**(1):51-9  
37  
38  
39 12. Lellouche F, Mancebo J, Jolliet P, et al. A multicenter randomized trial of computer-  
40  
41 driven protocolized weaning from mechanical ventilation. *Am J Respir Crit Care Med*  
42  
43 2006;**174**(8):894-900 doi: 10.1164/rccm.200511-1780OC[published Online First: Epub  
44  
45 Date]].  
46  
47  
48 13. Petter AH, Chiolerio RL, Cassina T, Chassot PG, Muller XM, Revely JP. Automatic  
49  
50 "respirator/weaning" with adaptive support ventilation: the effect on duration of  
51  
52 endotracheal intubation and patient management. *Anesth Analg* 2003;**97**(6):1743-50  
53  
54  
55  
56  
57  
58  
59  
60



- 1  
2  
3 14. Roth H, Luecke T, Lansche G, Bender HJ, Quintel M. Effects of patient-triggered  
4  
5 automatic switching between mandatory and supported ventilation in the  
6  
7 postoperative weaning period. *Intensive care medicine* 2001;**27**(1):47-51  
8  
9
- 10 15. Schädler D, Engel C, Elke G, et al. Automatic control of pressure support for ventilator  
11  
12 weaning in surgical intensive care patients. *Am J Respir Crit Care Med*  
13  
14 2012;**185**(6):637-44 doi: 10.1164/rccm.201106-1127OC[published Online First: Epub  
15  
16 Date]].  
17  
18
- 19 16. Sulzer CF, Chiolerio R, Chassot PG, Mueller XM, Revely JP. Adaptive support ventilation  
20  
21 for fast tracheal extubation after cardiac surgery: a randomized controlled study.  
22  
23 *Anesthesiology* 2001;**95**(6):1339-45  
24  
25
- 26 17. Tassaux D, Dalmas E, Gratadour P, Jolliet P. Patient-ventilator interactions during partial  
27  
28 ventilatory support: a preliminary study comparing the effects of adaptive support  
29  
30 ventilation with synchronized intermittent mandatory ventilation plus inspiratory  
31  
32 pressure support. *Crit Care Med* 2002;**30**(4):801-7  
33  
34  
35
- 36 18. Weiler N, Eberle B, Heinrichs W. Adaptive lung ventilation (ALV) during anesthesia for  
37  
38 pulmonary surgery: automatic response to transitions to and from one-lung  
39  
40 ventilation. *J Clin Monit Comput* 1998;**14**(4):245-52  
41  
42
- 43 19. Weiler N, Heinrichs W, Kessler W. The ALV-mode: a safe closed loop algorithm for  
44  
45 ventilation during total intravenous anesthesia. *International journal of clinical*  
46  
47 *monitoring and computing* 1994;**11**(2):85-8  
48  
49
- 50 20. Force ADT, Ranieri VM, Rubenfeld GD, et al. Acute respiratory distress syndrome: the  
51  
52 Berlin Definition. *JAMA : the journal of the American Medical Association*  
53  
54 2012;**307**(23):2526-33 doi: 10.1001/jama.2012.5669[published Online First: Epub  
55  
56 Date]].  
57  
58  
59  
60

- 1  
2  
3 21. disease Gficol. Pocket guide to COPD diagnosis, management and prevention, 2010.
- 4  
5 22. Hewlett AM, Platt AS, Terry VG. Mandatory minute volume. A new concept in weaning  
6  
7 from mechanical ventilation. *Anaesthesia* 1977;**32**(2):163-9
- 8  
9  
10 23. Brunner JX, Iotti GA. Adaptive Support Ventilation (ASV). *Minerva Anestesiol*  
11  
12 2002;**68**(5):365-68
- 13  
14 24. Campbell RS, Sinamban RP, Johannigman JA, et al. Clinical evaluation of a new closed  
15  
16 loop ventilation mode: adaptive supportive ventilation (ASV). *Critical Care*  
17  
18 1999;**3**(Suppl 1):P038
- 19  
20  
21 25. Tehrani FT. Jan. 22, 1991 1991. United States patent US Patent No. 4,986,268,.
- 22  
23 26. Tehrani FT. Automatic control of an artificial respirator. *Proc IEEE EMBS Conf* 1991  
24  
25 1993;**13**:1738-39
- 26  
27  
28 27. Putensen C, Hering R, Wrigge H. Controlled versus assisted mechanical ventilation. *Curr*  
29  
30 *Opin Crit Care* 2002;**8**(1):51-7
- 31  
32 28. Levine S, Nguyen T, Taylor N, et al. Rapid disuse atrophy of diaphragm fibers in  
33  
34 mechanically ventilated humans. *N Engl J Med* 2008;**358**(13):1327-35 doi:  
35  
36 10.1056/NEJMoa070447[published Online First: Epub Date] | .
- 37  
38  
39 29. Cook DJ, Walter SD, Cook RJ, et al. Incidence of and risk factors for ventilator-associated  
40  
41 pneumonia in critically ill patients. *Ann Intern Med* 1998;**129**(6):433-40
- 42  
43  
44 30. Froese AB, Bryan AC. Effects of anesthesia and paralysis on diaphragmatic mechanics in  
45  
46 man. *Anesthesiology* 1974;**41**(3):242-55
- 47  
48  
49 31. Putensen C, Zech S, Wrigge H, et al. Long-term effects of spontaneous breathing during  
50  
51 ventilatory support in patients with acute lung injury. *Am J Respir Crit Care Med*  
52  
53 2001;**164**(1):43-9 doi: 10.1164/ajrccm.164.1.2001078[published Online First: Epub  
54  
55 Date] | .
- 56  
57  
58  
59  
60

## Contributorship statement

DS, GM, TB, IF, NW and CH substantially contributed to the conception and design of the study. DS drafted the first version of the manuscript. DS, GM, TB, IF, NW and CH revised the manuscript critically for important intellectual content and approved the final version of the manuscript.

## Funding

Drägerwerk AG & Co. KGaA, Lübeck, Germany provides a restricted research grant and one anesthesia machines equipped with Smart Vent Control for the conduction of the study to each of the participating study sites.

## Acknowledgement

The authors would like to thank Stefan Mersmann, Drägerwerk AG & Co. KGaA, Lübeck, Germany for excellent support especially in the description of the Smart Vent Control system.

## Competing interest

DS, TB, IF, NW and CH received lecture fees from Drägerwerk AG & Co. KGaA, Lübeck, Germany. DS received consultant honoraria from Drägerwerk AG & Co. KGaA, Lübeck, Germany.

1  
2  
3  
4  
5  
6  
7  
8  
9  
10  
11  
12  
13  
14  
15  
16  
17  
18  
19  
20  
21  
22  
23  
24  
25  
26  
27  
28  
29  
30  
31  
32  
33  
34  
35  
36  
37  
38  
39  
40  
41  
42  
43  
44  
45  
46  
47  
48  
49  
50  
51  
52  
53  
54  
55  
56  
57  
58  
59  
60

**Figure legend**

**Figure 1.** Flowchart of study procedure.

For peer review only

1  
2  
3  
4  
5  
6  
7  
8  
9  
10  
11  
12  
13  
14  
15  
16  
17  
18  
19  
20  
21  
22  
23  
24  
25  
26  
27  
28  
29  
30  
31  
32  
33  
34  
35  
36  
37  
38  
39  
40  
41  
42  
43  
44  
45  
46  
47  
48  
49  
50  
51  
52  
53  
54  
55  
56  
57  
58  
59  
60

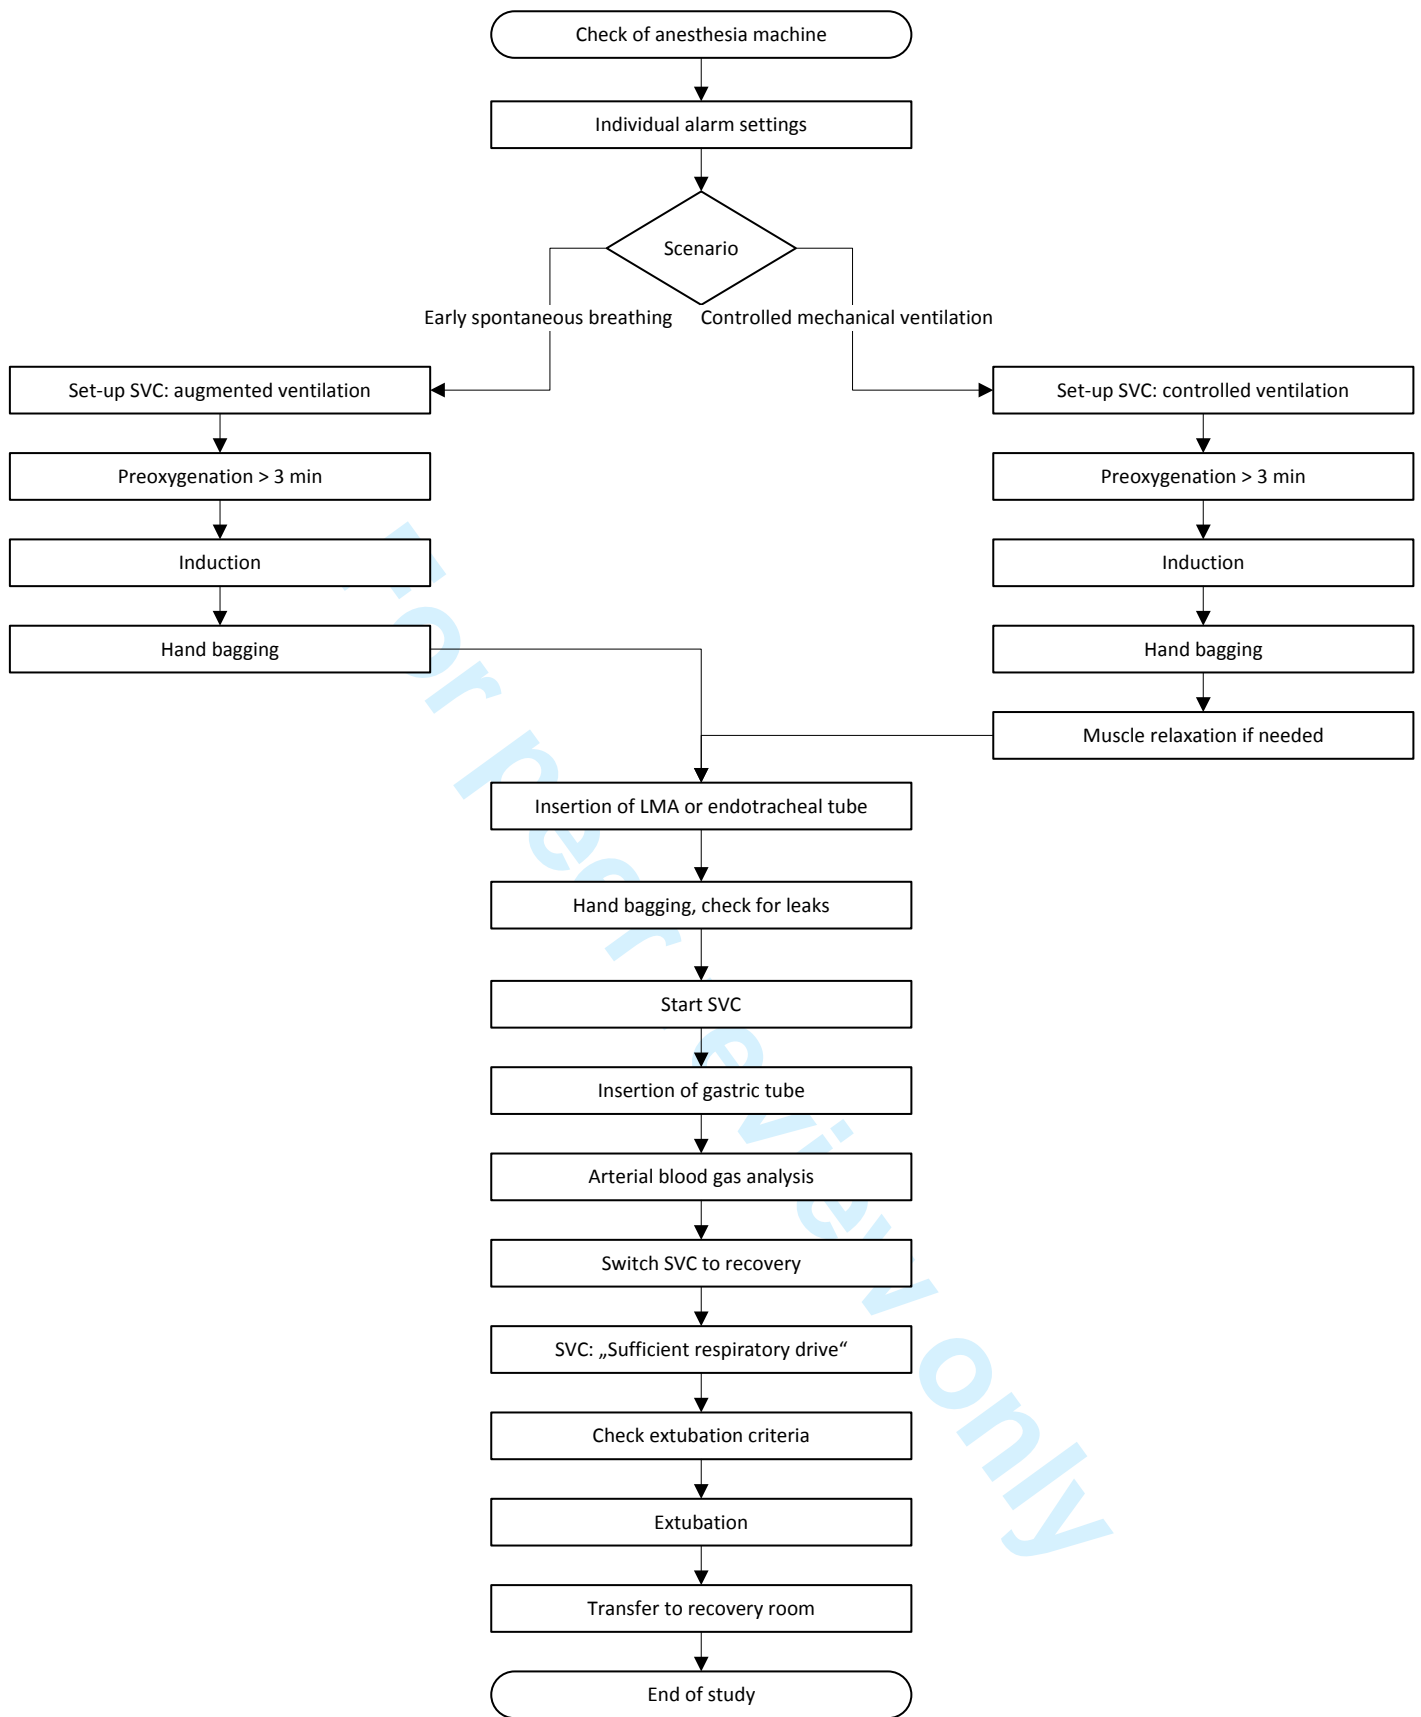

# AVAS trial

Automated control of mechanical  
ventilation during general anaesthesia

A bicentric prospective observational trial

Study protocol

For peer review only

1  
2  
3  
4  
5  
6  
7  
8  
9  
10  
11  
12  
13  
14  
15  
16  
17  
18  
19  
20  
21  
22  
23  
24  
25  
26  
27  
28  
29  
30  
31  
32  
33  
34  
35  
36  
37  
38  
39  
40  
41  
42  
43  
44  
45  
46  
47  
48  
49  
50  
51  
52  
53  
54  
55  
56  
57  
58  
59  
60

## General information

### *Principle investigators*

- I. Prof. Dr. med. Norbert Weiler  
University Medical Center Schleswig-Holstein, Campus Kiel  
Department of Anesthesiology and Intensive Care Medicine  
Arnold-Heller-Str. 3, Haus 12  
24105 Kiel  
Germany  
Tel.: +49 431 597-1025  
[norbert.weiler@uksh.de](mailto:norbert.weiler@uksh.de)
- II. Prim. Univ.-Prof. Dr. Christoph Hörmann  
State Hospital St. Pölten  
Anesthesiology and Intensive Care Medicine  
Propst-Führer-Straße 4  
3100 St. Pölten  
Austria  
Tel.: +43 2742/9004-11006  
Christoph.Hoermann@stpoelten.lknoe.at

### *Study team*

#### **I. Kiel**

Prof. Dr. Norbert Weiler (principal investigator)

Dr. med. Dirk Schädler (deputy investigator)

Dr. med. Tobias Becher (investigator)

Stefanie D'aria (study nurse)

Corinna Buchholz (study nurse)

#### **II. St. Pölten**

Univ.-Prof. Dr. Christoph Hörmann (principal investigator)

Dr. med. Georg Miestinger (investigator)

### Summary

|                     |                                                                                                                                                                                                                                                                                                                                                                                                                                                                                                                                                                                                                         |
|---------------------|-------------------------------------------------------------------------------------------------------------------------------------------------------------------------------------------------------------------------------------------------------------------------------------------------------------------------------------------------------------------------------------------------------------------------------------------------------------------------------------------------------------------------------------------------------------------------------------------------------------------------|
| Title               | Prospective, bicentric observational study to assess a novel system for automated control of mechanical ventilation (SmartCare/AVent) during general anesthesia                                                                                                                                                                                                                                                                                                                                                                                                                                                         |
| Short title         | AVAS-trial                                                                                                                                                                                                                                                                                                                                                                                                                                                                                                                                                                                                              |
| Indication          | Patients under general anesthesia                                                                                                                                                                                                                                                                                                                                                                                                                                                                                                                                                                                       |
| Design              | Prospective observational trial                                                                                                                                                                                                                                                                                                                                                                                                                                                                                                                                                                                         |
| Primary endpoint    | <ul style="list-style-type: none"> <li>Number of adverse events</li> </ul>                                                                                                                                                                                                                                                                                                                                                                                                                                                                                                                                              |
| Secondary endpoints | <ul style="list-style-type: none"> <li>Number of normoventilated, hypoventilated and hyperventilated patients.</li> <li>Time period between switch from control to assisted ventilation and achievement of stable assisted ventilation of the patient</li> <li>Proportion of time within the target zones for tidal volume and PetCO<sub>2</sub> as individually set up for each patient by the user</li> <li>Number of alarms (anesthesia machine, SmartCare/AVent)</li> <li>Frequency distribution of tidal volume, inspiratory pressure, inspiration time, expiration time and PetCO<sub>2</sub>.</li> </ul>         |
| Target population   | <p><b>Inclusion criteria</b></p> <ul style="list-style-type: none"> <li>Planned elective surgery of the upper limb, lower limb or, peripheral vascular surgery in general anesthesia</li> <li>ASA I, II or III</li> <li>Age ≥ 18 years</li> <li>Written consent of the patient for study participation</li> </ul> <p><b>Exclusion criteria</b></p> <ul style="list-style-type: none"> <li>Mild, moderate or severe acute respiratory distress syndrome (ARDS)</li> <li>Known chronic obstructive pulmonary disease Gold stage III or higher</li> <li>Two or more organ failures</li> <li>Patient is pregnant</li> </ul> |
| Sample size         | n=100 (50 per center)                                                                                                                                                                                                                                                                                                                                                                                                                                                                                                                                                                                                   |
| Intervention        | All patients will be mechanically ventilated with a novel automated mechanical ventilation system called SmartCare/AVent                                                                                                                                                                                                                                                                                                                                                                                                                                                                                                |
| Length of study     | Approximately 6 months                                                                                                                                                                                                                                                                                                                                                                                                                                                                                                                                                                                                  |
| Sponsor             | None                                                                                                                                                                                                                                                                                                                                                                                                                                                                                                                                                                                                                    |
| Registration        | <a href="https://clinicaltrials.gov/ct2/show/study/NCT02644005">clinicaltrials.gov ID NCT02644005</a>                                                                                                                                                                                                                                                                                                                                                                                                                                                                                                                   |

## Rationale and background

Automated control of ventilator settings is a technology which is commonly used in ventilators used in the intensive care unit. Different systems (e. g. Intellivent-Adaptive support ventilation [1], SmartCare/PS [2], neurally adjusted ventilator assist [3]) were developed and commercially distributed. Most of the systems are available since many years and were studied intensely [4-9].



1  
2  
3  
4  
5 During general anesthesia, the physician has to set-up the same ventilator settings as on an intensive  
6 care ventilator, however an automated control of ventilator settings is currently not available on  
7 anesthesia ventilators.  
8

9  
10 The SmartCare/AVent option is an automated control of ventilator settings (mechanical breathing  
11 frequency, inspiratory pressure, pressure support, inspiratory time, trigger sensitivity) which is  
12 available as an software option on a Zeus anesthesia ventilator (Dräger Medical, Lübeck, Germany).  
13 The system is CE-certified and currently no study investigating this device in a clinical study was  
14 published.  
15

16  
17 SmartCare/AVent controls the ventilator settings with the aim to keep a patient stable in a zone of  
18 respiratory comfort. This zone is adoptable by the user for each individual patient and consists of  
19

- 20 • Lower limit for tidal volume
- 21 • Upper limit for tidal volume
- 22 • Lower limit for endtidal carbon dioxide concentration
- 23 • Upper limit for endtidal carbon dioxide concentration
- 24
- 25

26 Based on these limits, the system derives new ventilator settings every 15 seconds and is able to  
27 change the ventilator mode from controlled mechanical ventilation (pressure controlled ventilation)  
28 to assisted ventilation (pressure support ventilation). The physician has always the opportunity to  
29 change manually the ventilator settings or to stop the system. If SmartCare/AVent detects  
30 spontaneous breathing activity, the mechanical breathing frequency will automatically be decreased  
31 with the aim to increase the portion of spontaneous ventilation. The patient will be continuously  
32 monitored for possible instabilities. Last, the physician will be supported in the recovery process of  
33 the general anesthesia by supporting the induction of spontaneous breathing and by checking  
34 whether the respiratory drive of the patient is sufficient for extubation.  
35  
36

37  
38 SmartCare/AVent may have the following beneficial effects:  
39

- 40 • Improve efficacy and safety of mechanical ventilation during general anesthesia
- 41 • Increase the time period with assisted ventilation
- 42 • Decrease postoperative pulmonary complications
- 43 • Decrease the time needed for recovery of general anesthesia.
- 44
- 45

46 The purpose of this study is to describe the application of SmartCare/AVent in a clinical study and to  
47 assess its safety and efficacy.  
48  
49

## 50 Endpoints

### 51 *Primary endpoint*

- 52 • Frequency of adverse events (AE) defined as follows:
  - 53 ○ Severe Hypoventilation defined as minute volume lower than 40 ml/kg predicted  
54 body weight for longer than 5 minutes
  - 55 ○ Apnea for longer than 90 seconds
  - 56
  - 57
  - 58
  - 59
- 60

- Hyperventilation defined as endtidal partial carbon dioxide pressure (PetCO<sub>2</sub>) lower than 5 mm Hg of the lower target setting for the SmartCare/AVent system for longer than 5 minutes
- Hypoventilation defined as PetCO<sub>2</sub> higher than 5 mm Hg of the upper target setting for the SmartCare/AVent system for longer than 5 minutes
- Respiratory rate > 35 breaths per minute for longer than 5 minutes
- Any override or stop of the automated controlled ventilation settings by the anesthesiologist in charge if the settings are clinically not acceptable. The reasons for overriding or stopping the system will be noted.

### *Secondary endpoints*

- Frequency of normoventilated, hypoventilated and hyperventilated patients. The responsible anesthesiologist defines a target range for the arterial partial pressure of carbon dioxide (PaCO<sub>2\_target</sub>) before the induction of the general anesthesia and sets up the corresponding endtidal CO<sub>2</sub>-range in the automated ventilation system. 15 minutes after the begin of the surgical procedure an arterial blood gas analysis will be performed and the PaCO<sub>2</sub> will be measured. Then patients will be classified as follows:
  - hypoventilated patient: PaCO<sub>2</sub> > (PaCO<sub>2\_target</sub>+5)
  - hyperventilated patient: PaCO<sub>2</sub> < (PaCO<sub>2\_target</sub>-5)
  - normoventilated patient: (PaCO<sub>2\_target</sub>-5) ≤ PaCO<sub>2</sub> ≤ PaCO<sub>2\_target</sub>+5
- Time period between switch from controlled ventilation to augmented ventilation and achievement of stable assisted ventilation of the patient
- Proportion of time within the target zones for tidal volume and PetCO<sub>2</sub> as individually set up for each patient by the user
- Frequency of alarms
- Frequency distribution of tidal volume, inspiratory pressure, inspiration time, expiration time and PetCO<sub>2</sub>
- Number of re-intubations

## **Study description**

### *Study design*

Prospective, observational study in two University Hospitals:

- I. University Medical Center Schleswig-Holstein, Campus Kiel  
Department of Anesthesiology and Intensive Care Medicine  
Arnold-Heller-Str. 3, Haus 12  
24105 Kiel  
Germany
- II. Karl Landsteiner Privat University

University Hospital St. Pölten  
Department of Anesthesiology and Intensive Care Medicine  
Propst-Führer-Straße 4  
3100 St. Pölten  
Austria

### *Sample size*

100 patients (50 patients per center).

### *Expected duration of the study*

6 months.

## **Target population**

### *Inclusion criteria*

All patients have to fulfill the following inclusion criteria:

- Planned elective surgery of the upper limb, lower limb or peripheral vascular surgery in general anesthesia
- Patient is classified as ASA I, II or III
- Age  $\geq$  18 years
- Written consent of the patient for study participation

### *Exclusion criteria*

Patients are excluded when the following criteria are fulfilled:

- Mild, moderate or severe acute respiratory distress syndrome (ARDS)[10]
- Known chronic obstructive pulmonary disease Gold stage III or higher
- Two or more of the following organ failures
  - Mild, moderate or severe ARDS
  - Hemodynamic instability: systolic blood pressure  $<$  90 mm Hg, mean arterial pressure  $<$  70 mm Hg or administration of any vasoactive drugs.
  - Acute renal failure: oliguria (urine output  $<$  0.5 ml/kg/h for at least 2 hours despite of adequate management or creatinine increase  $>$  0.5 mg/dl
  - Cerebral failure: loose of consciousness or encephalopathy
- Patient is pregnant.

## **Procedure of the study**

Patients will be screened for possible study inclusion during the premedication visit.

### *Ethics committee*

The study will be started after approval of the local ethics committees.

### *Study consent*

Patients have to give written informed consent for study inclusion during the premedication visit.

### *Intervention*

All patients will be ventilated with the SmartCare/AVent system available on the ZEUS anesthesia machine (Dräger Medical Lübeck, Germany). The SmartCare/AVent system does not control the inspired fraction of oxygen ( $F_{iO_2}$ ) and positive end-expiratory pressure (PEEP). Therefore, the user has to set up both settings during the whole general anesthesia with the aim to reach  $SpO_2$  greater than 95%.

Anesthesia will be performed by a physician of the study team who has been trained in using the SmartCare/AVent system. The physician can overrule or stop the system if this is necessary for patient safety. Reason for stopping or overruling will be documented.

Two different study scenarios are possible (according to the surgical procedure):

- I. Early spontaneous breathing: Patient is allowed to breathe spontaneously immediately after induction of the general anesthesia.
- II. Controlled mechanical ventilation: Patients will be ventilated in a controlled ventilation mode as long as needed for the surgical procedure. Then, spontaneous breathing will be allowed as soon as possible.

The study will proceed as follows:

#### **I. Early spontaneous breathing**

- Check of the anesthesia machine
- Set up of the individual alarm settings
- Set up of the SmartCare/AVent system:
  - level of ventilation, airway and lung mechanics as clinically indicated
  - phase: augmented ventilation
- Preoxygenation of the patient with an  $F_{iO_2} = 1$  for at least 3 minutes
- Induction of the general anesthesia with an opioid (remifentanil, fentanyl or sufentanil) and propofol
- Hand bagging
- Insertion of the laryngeal mask or endotracheal tube
- Hand bagging while checking for significant leakage (laryngeal mask) and correction if needed
- Continuous infusion of remifentanil and propofol or administration of sevoflurane
- Start of SmartCare/AVent
- Insertion and position check of a gastric tube (routine)
- Arterial blood gas analysis 15 minutes after the begin of the surgical procedure (routine)

- Stop of the continuous infusion of remifentanil and propofol (or sevoflurane) immediately after the end of the surgical procedure and switch the SmartCare/AVent system to “recovery”

## **II. Controlled mechanical ventilation**

- Check of the anaesthesia machine
- Set up of the individual alarm settings
- Set up of the SmartCare/AVent system
  - level of ventilation, airway and lung mechanics as clinically indicated
  - phase: controlled ventilation
- Preoxygenation of the patient with an  $F_{iO_2} = 1$  for at least 3 minutes
- Induction of the general anaesthesia with an opioid (remifentanil, fentanyl or sufentanil) and propofol
- Hand bagging
- Administration of muscle relaxant agent (rocuronium, cis-atracurium or succinylcholine) if needed
- Insertion of the laryngeal mask or endotracheal tube
- Hand bagging while checking for significant leakage and correction if needed
- Continuous infusion of remifentanil and propofol or administration of sevoflurane
- Start of SmartCare/AVent
- Insertion and position check of a gastric tube (routine)
- Arterial blood gas analysis 15 minutes after the begin of the surgical procedure (routine)
- Stepwise decrease of remifentanil and propofol (or sevoflurane) with the aim to allow spontaneous breathing activity and switch the SmartCare/AVent system to “Augmented Ventilation”
- If no spontaneous breaths will be detected during 20 minutes the SmartCare/AVent system will be switched to “Encourage Spontaneous Breathing”
- Stop of the continuous infusion of remifentanil and propofol (or sevoflurane) immediately after the end of the surgical procedure and switch the SmartCare/AVent system to “Recovery”

## **Extubation**

Readiness for extubation is given when SmartCare/AVent proposes separation from the ventilator.

Extubation will be performed when the following criteria are satisfied:

- Patient is awake and cooperative
- Sufficient airway protection or the Glasgow Coma Scale (GCS) >8
- No surgical contraindication.

After extubation, the patients will be monitored for at least 5 minutes in the operating room (OR).

### *End of study*

The study period ends with the initiation of the patients' transfer from the OR to the recovery room.

### **Data recording**

Beginning with the time of the study period all available data from the ventilator will be recorded via the MEDIBUS interface. In detail, flow, pressure and CO<sub>2</sub> values will be stored every 8 ms ("fast data"), all ventilator settings, measurements and alarms will be stored at least every second ("slow data"). All SmartCare/AVent patient session journal files will be systematically stored. Heart rate, SpO<sub>2</sub> and arterial blood pressures will be recorded at least every 5 minutes. Esophageal pressure swings will be recorded continuously ("fast data").

### **End-point determination**

The end-points of the study are evaluated using the recorded data and the protocolled data of the study team.

### **Ethical and legal aspects**

In this clinical study, a novel system for automated control of mechanical ventilation will be examined. The system adapts ventilator settings according to the actual clinical situation which may lead to a shorter time period of controlled ventilation. There is no increased risk for the studied patients. SmartCare/AVent bases on well-known and established ventilator modes. In case of a technical breakdown of SmartCare/AVent, the anesthesia ventilator will continue its work. During the whole study period, a specially trained physician of the study team is at the patient in the OR and conducts the study. He monitors the patient and SmartCare/AVent and is able to stop the system at any time.

### **Additional examinations**

None.

### **Medical device**

The SmartCare/AVent option and the anesthesia ventilator Zeus used in this study is CE-certified. A copy of the CE-certificate is available as appendix of this experimental protocol.

### **Patient information and informed consent**

Patients will be screened during the premedication visits for possible study inclusion. Possible study candidates will be informed about the study in detail and asked to give consent for study participation.

### **Patient assurance**

All medical devices used in this study are CE-certified. Therefore, a patient assurance is not needed.

## Rules for early termination of the study

During each treatment of a patient in this study, the investigator is enabled to stop the study procedure when the ventilator settings controlled by the SmartCare/AVent system are clinically not appropriate or in case of a technical failure of the SmartCare/AVent system.

The study will be terminated if the study procedure was stopped by the investigator (as described above) in 5 consecutive patients.

## Statistical analysis

Descriptive statistical analyses (mean  $\pm$  standard deviation, median and 95% confidence interval where appropriate) will be used.

## References

1. **Arnal JM, Wysocki M, Novotni D, Demory D, Lopez R, Donati S, Granier I, Corno G, Durand-Gasselin J:** Safety and efficacy of a fully closed-loop control ventilation (IntelliVent-ASV(R)) in sedated ICU patients with acute respiratory failure: a prospective randomized crossover study. *Intensive Care Med* 2012;38:781-787.
2. **Dojat M, Brochard L, Lemaire F, Harf A:** A knowledge-based system for assisted ventilation of patients in intensive care units. *International journal of clinical monitoring and computing* 1992;9:239-250.
3. **Sinderby C, Navalesi P, Beck J, Skrobik Y, Comtois N, Friberg S, Gottfried SB, Lindstrom L:** Neural control of mechanical ventilation in respiratory failure. *Nature medicine* 1999;5:1433-1436.
4. **Burns KEA, Meade MO, Lessard MR, Hand L, Zhou Q, Keenan SP, Lellouche F:** Wean Earlier and Automatically with New Technology (the WEAN Study). A Multicenter, Pilot Randomized Controlled Trial. *Am J Respir Crit Care Med* 2013;187:1203-1211.
5. **Lellouche F, Mancebo J, Jolliet P, Roeseler J, Schortgen F, Dojat M, Cabello B, Bouadma L, Rodriguez P, Maggiore S *et al*:** A multicenter randomized trial of computer-driven protocolized weaning from mechanical ventilation. *Am J Respir Crit Care Med* 2006;174:894-900.
6. **Liu L, Xu XT, Yang Y, Huang YZ, Liu SQ, Qiu HB:** Computer-driven automated weaning reduces weaning duration in difficult-to-wean patients. *Chinese medical journal* 2013;126:1814-1818.
7. **Rose L, Presneill JJ, Johnston L, Cade JF:** A randomised, controlled trial of conventional versus automated weaning from mechanical ventilation using SmartCare/PS. *Intensive Care Med* 2008;34:1788-1795.
8. **Schädler D, Engel C, Elke G, Pulletz S, Haake N, Frerichs I, Zick G, Scholz J, Weiler N:** Automatic control of pressure support for ventilator weaning in surgical intensive care patients. *Am J Respir Crit Care Med* 2012;185:637-644.
9. **Stahl C, Dahmen G, Ziegler A, Muhl E:** Comparison of automated protocol-based versus non-protocol-based physician-directed weaning from mechanical ventilation. *Intensivmedizin und Notfallmedizin* 2009;46:441-446.
10. **Force ADT, Ranieri VM, Rubenfeld GD, Thompson BT, Ferguson ND, Caldwell E, Fan E, Camporota L, Slutsky AS:** Acute respiratory distress syndrome: the Berlin Definition. *Jama* 2012;307:2526-2533.

1  
2  
3  
4  
5  
6  
7  
8  
9  
10  
11  
12  
13  
14  
15  
16  
17  
18  
19  
20  
21  
22  
23  
24  
25  
26  
27  
28  
29  
30  
31  
32  
33  
34  
35  
36  
37  
38  
39  
40  
41  
42  
43  
44  
45  
46  
47  
48  
49  
50  
51  
52  
53  
54  
55  
56  
57  
58  
59  
60

**Appendix**

For peer review only



# BMJ Open

## Automated control of mechanical ventilation during general anesthesia – study protocol of a bicentric observational study (AVAS study)

|                                 |                                                                                                                                                                                                                                                                                                                                                                                                                                                                                                                                                                                                                                                                                                                                                                                          |
|---------------------------------|------------------------------------------------------------------------------------------------------------------------------------------------------------------------------------------------------------------------------------------------------------------------------------------------------------------------------------------------------------------------------------------------------------------------------------------------------------------------------------------------------------------------------------------------------------------------------------------------------------------------------------------------------------------------------------------------------------------------------------------------------------------------------------------|
| Journal:                        | <i>BMJ Open</i>                                                                                                                                                                                                                                                                                                                                                                                                                                                                                                                                                                                                                                                                                                                                                                          |
| Manuscript ID                   | bmjopen-2016-014742.R1                                                                                                                                                                                                                                                                                                                                                                                                                                                                                                                                                                                                                                                                                                                                                                   |
| Article Type:                   | Protocol                                                                                                                                                                                                                                                                                                                                                                                                                                                                                                                                                                                                                                                                                                                                                                                 |
| Date Submitted by the Author:   | 01-Feb-2017                                                                                                                                                                                                                                                                                                                                                                                                                                                                                                                                                                                                                                                                                                                                                                              |
| Complete List of Authors:       | Schädler, Dirk; University Medical Center Schleswig-Holstein, Campus Kiel, Department of Anesthesiology and Intensive Care Medicine<br>Miestinger, Georg; University Hospital St. Pölten, Department of Anesthesiology and Intensive Care Medicine<br>Becher, Tobias; University Medical Center Schleswig-Holstein, Campus Kiel, Department of Anesthesiology and Intensive Care Medicine<br>Frerichs, Inéz; University Medical Center Schleswig-Holstein, Campus Kiel, Department of Anesthesiology and Intensive Care Medicine<br>Weiler, Norbert; University Medical Center Schleswig-Holstein, Campus Kiel, Department of Anesthesiology and Intensive Care Medicine<br>Hörmann, Christoph; University Hospital St. Pölten, Department of Anesthesiology and Intensive Care Medicine |
| <b>Primary Subject Heading</b>: | Anaesthesia                                                                                                                                                                                                                                                                                                                                                                                                                                                                                                                                                                                                                                                                                                                                                                              |
| Secondary Subject Heading:      | Respiratory medicine, Surgery, Patient-centred medicine                                                                                                                                                                                                                                                                                                                                                                                                                                                                                                                                                                                                                                                                                                                                  |
| Keywords:                       | Adult anaesthesia < ANAESTHETICS, Adult surgery < SURGERY, Clinical trials < THERAPEUTICS                                                                                                                                                                                                                                                                                                                                                                                                                                                                                                                                                                                                                                                                                                |
|                                 |                                                                                                                                                                                                                                                                                                                                                                                                                                                                                                                                                                                                                                                                                                                                                                                          |

SCHOLARONE™  
Manuscripts

# Automated control of mechanical ventilation during general anesthesia – study protocol of a bicentric observational study (AVAS study)

---

Dirk Schädler<sup>1\*</sup> MD, dirk.schaedler@uksh.de

Georg Miestinger<sup>2</sup> MD, georg.miestinger@stpoelten.lknoe.at

Tobias Becher<sup>1</sup> MD, tobias.becher@uksh.de

Inéz Frerichs<sup>1</sup> MD, inez.frerichs@uksh.de

Norbert Weiler<sup>1</sup> MD, norbert.weiler@uksh.de

Christoph Hörmann<sup>2</sup> MD, christoph.hoermann@stpoelten.lknoe.at

<sup>1</sup>Department of Anesthesiology and Intensive Care Medicine, University Medical Center Schleswig-Holstein, Campus Kiel, Arnold-Heller-Straße 3, Haus 12, 24105 Kiel, Germany.

<sup>2</sup>Department of Anesthesiology and Intensive Care Medicine, University Hospital St. Pölten, Propst-Führer-Straße 4, St. Pölten A-3100

\*Corresponding author

## Abstract

**Introduction:** Automated control of mechanical ventilation during general anesthesia is not common. A novel system for automated control of most of the ventilator settings was designed and is available on an anesthesia machine.

**Methods and analysis:** The AVAS study is an international investigator-initiated bicentric observational study designed to examine safety and efficacy of the system during general anesthesia. The system controls mechanical breathing frequency, inspiratory pressure, pressure support, inspiratory time and trigger sensitivity with the aim to keep a patient stable in user adoptable target zones. Adult patients who are classified as American Society of Anesthesiologists physical status I, II or III, scheduled for elective surgery of the upper or lower limb or for peripheral vascular surgery in general anesthesia without any additional regional anesthesia technique and who gave written consent for study participation are eligible for study inclusion. Primary endpoint of the study is the frequency of specifically defined adverse events. Secondary endpoints are frequency of normoventilation, hypoventilation and hyperventilation, the time period between switch from controlled ventilation to assisted ventilation, achievement of stable assisted ventilation of the patient, proportion of time within the target zones for tidal volume, end-tidal partial pressure of carbon dioxide as individually set up for each patient by the user, frequency of alarms, frequency distribution of tidal volume, inspiratory pressure, inspiration time, expiration time, end-tidal partial pressure of carbon dioxide and the number of re-intubations.

**Ethics and Dissemination:** AVAS will be the first clinical study investigating a novel automated system for the control of mechanical ventilation on an anesthesia machine. The study was approved by the Ethics Committee of both participating study sites. In case that

1  
2  
3 safety and efficacy are acceptable, a randomized controlled trial comparing the novel system  
4  
5 with the usual practice may be warranted.  
6  
7

8 **Trial registration: DRKS DRKS00011025, registered 12 October 2016; clinicaltrials.gov ID**

9  
10  
11 **NCT02644005, registered 30 December 2015**

12  
13  
14 **Abstract word count: 292/300**

## 15 16 17 18 **Strengths and limitations of this study**

- 19  
20  
21 •Safety and efficacy of a novel system for the automated control of mechanical  
22  
23 ventilation on an anesthesia machine as well as feasibility of early assisted  
24  
25 ventilation during general anesthesia in terms of a proof-of-concept approach will  
26  
27 be assessed using an observational study design.  
28  
29
- 30  
31 •In case that safety and efficacy are acceptable, a randomized controlled trial  
32  
33 comparing the novel system with the usual practice may be warranted. For the  
34  
35 design of such a study, the results and the experience obtained with the AVAS  
36  
37 study would be of benefit.  
38  
39
- 40  
41 •The clinical value of the AVAS study will be limited due to the observational study  
42  
43 design.  
44  
45  
46  
47

## 48 **Keywords**

49  
50 Closed-loop-control of mechanical ventilation, knowledge based system, spontaneous  
51  
52 breathing, general anesthesia, automatic control of artificial ventilation.  
53  
54  
55  
56  
57  
58  
59  
60

## Introduction

Automated control of mechanical ventilation is a technology which has been introduced in ventilators used in the intensive care unit (ICU). Different systems (e. g. Intellivent - Adaptive Support Ventilation [1], SmartCare/PS [2], Neurally Adjusted Ventilator Assist [3]) were developed and commercially distributed. When comparing the performance of automated systems with the clinical routine it has been shown that automated systems are able to keep a patient in a specified target zone for a significantly higher percentage of time than clinicians [4 5]. Several randomized controlled trials investigated the effect of automated systems on ventilation time in patients who were weaned from mechanical ventilation. In some studies no significant differences in ventilation times were found [6-11], other studies revealed that automated systems shortened the ventilation time [12-18] when compared to weaning protocols or usual care.

During general anesthesia, the physician has to set-up the same ventilator settings as on an intensive care ventilator. However, an automated control of ventilator settings is currently not available on anesthesia machines. A novel system called Smart Vent Control (SVC) was designed. SVC automatically controls the mechanical breathing frequency, inspiratory time, inspiratory pressure, pressure support and trigger sensitivity and was implemented on an anesthesia machine (Zeus Infinity Empowered, Drägerwerk AG & Co. KGaA, Lübeck, Germany). The system is designed to adapt the ventilatory settings to keep a patient stable in a target zone. Furthermore, spontaneous breathing activity will be supported as soon as possible. In this paper we describe the design of the first clinical study that will be performed with SVC during general anesthesia.

## Methods and Analysis

The “Automated control of mechanical ventilation during general anesthesia study (AVAS study) is an international investigator-initiated bicentric observational study investigating the application of SVC during general anesthesia. The study was approved by the Ethics Committee of the Medical Faculty of the Christian Albrechts University Kiel, Germany (A154/14) by the Ethics Committee of the county Niederösterreich (GS-1-EK-3/118-2016) and is

registered at clinicaltrials.gov (NCT02644005). The main objective of this study is to describe the application of SVC and to assess its safety and efficacy.

### Description of the system

SVC controls automatically the following ventilator settings:

- Mechanical breathing frequency ( $f_{\text{mech}}$ )
- Inspiratory pressure ( $P_{\text{insp}}$ )
- Pressure support (PS)
- Inspiratory time ( $T_i$ )
- Trigger sensitivity ( $T_s$ ).

Inspired fraction of oxygen and positive endexpiratory pressure are not controlled automatically. SVC adjusts the ventilator settings with the aim to keep a patient stable in a target zone (TZ). Numerous predefined TZs exist that can be set according to the current therapeutic situation. All TZs can be customized by the user for each individual patient and consist of upper and lower limits for tidal volume ( $V_T$ ) and for the partial pressure of end-tidal carbon dioxide ( $P_{\text{etCO}_2}$ ). Based on these limits, the system classifies the current quality of ventilation, called Classification of Ventilation (CoV), and derives new ventilator settings accordingly. This is done every 15 seconds. The physician always has the opportunity to

1  
2  
3 change the ventilator settings manually or to stop the system. If SVC detects spontaneous  
4  
5 breathing activity, the mechanical breathing frequency is decreased automatically with the  
6  
7 aim to increase the portion of spontaneous ventilation adequately if “augmented  
8  
9 ventilation” is activated. In case that “encourage spontaneous breathing” is activated SVC  
10  
11 will automatically change the ventilator mode from controlled mechanical ventilation  
12  
13 (pressure controlled ventilation, PCV) to assisted ventilation (pressure support ventilation,  
14  
15 PSV) if PetCO<sub>2</sub> is classified as mild hypoventilation. The patient is continuously monitored for  
16  
17 possible instabilities. Lastly, the physician is supported in the recovery process of general  
18  
19 anesthesia by supporting the induction of spontaneous breathing and by checking whether  
20  
21 the respiratory drive of the patient is sufficient for extubation.  
22  
23  
24  
25  
26

27 SVC is available as a software option on Zeus Infinity Empowered anesthesia machines  
28  
29 (Drägerwerk AG & Co. KGaA, Lübeck, Germany) and is approved as a medical product  
30  
31 according to 93/42/European Economic Community (EEC).  
32  
33  
34

### 35 **Patient screening**

36  
37 The study team (study nurses and study physicians) will screen consecutively for eligible  
38  
39 patients the day before surgery. Possible study candidates will be informed about the study  
40  
41 in detail and asked to give consent for study participation.  
42  
43  
44

### 45 **Inclusion and exclusion criteria**

46  
47 The following inclusion criteria will be used:  
48  
49

- 50  
51 • Elective surgery of the upper limb, lower limb or peripheral vascular surgery in  
52  
53 general anesthesia without any additional regional anesthesia technique  
54  
55  
56  
57  
58  
59  
60

- Patient is classified as American Society of Anesthesiologists (ASA) physical status I, II or III
- Age  $\geq$  18 years
- Written consent of the patient for study participation.

Patients will be excluded when meeting one or more of the following exclusion criteria:

- Mild, moderate or severe acute respiratory distress syndrome (ARDS) [19]
- Known chronic obstructive pulmonary disease Gold stage III or higher [20]
- Known neuro-muscular disease
- Patient is pregnant
- Two or more of the following acute organ failures
  - Hemodynamic instability defined as systolic blood pressure  $<$  90 mm Hg, mean arterial pressure  $<$  70 mmHg or administration of any vasoactive drugs
  - Acute renal failure defined as oliguria, i.e. urine output  $<$  0.5 ml/kg/h for at least 2 hours despite of adequate management or creatinine increase  $>$  0.5 mg/dl
  - Cerebral failure: loss of consciousness or encephalopathy.

### Study procedure

All patients will be ventilated with SVC. Since SVC does not control the inspired fraction of oxygen ( $F_{I}O_2$ ) and positive end-expiratory pressure (PEEP), the user will have to set up both



1  
2  
3 of these settings during the whole general anesthesia with the aim to reach a peripheral  
4  
5 saturation of oxygen (SpO<sub>2</sub>) greater than 95%.  
6  
7

8  
9 Anesthesia will be performed by a physician of the study team who has been trained in  
10 using SVC. The physician can overrule or stop the system at any time if this is necessary for  
11 patient safety. Reasons for stopping or overruling will be documented. Insertion of a tube for  
12 gastric decompression is part of our routine clinical practice in endotracheally intubated  
13 patients. For this study, we will use a gastric tube for decompression that is additionally  
14 equipped with an esophageal balloon for assessment of esophageal pressure (Nutrivent,  
15 Sidam, Mirandola, Italy).  
16  
17  
18  
19  
20  
21  
22  
23

24  
25  
26 Two different study scenarios are possible according to the surgical procedure (Figure 1):  
27

28  
29 i) *Early spontaneous breathing*: Patient is allowed to breathe spontaneously immediately  
30 after induction of the general anesthesia, ii) *Controlled mechanical ventilation*: Patient will  
31 be ventilated in a controlled ventilation mode as long as needed for the surgical procedure.  
32  
33 Then, spontaneous breathing will be allowed as soon as possible.  
34  
35  
36  
37  
38

39 The study will proceed as follows:  
40

#### 41 42 **I. Early spontaneous breathing**

- 43 • Check of the anesthesia machine
- 44
- 45 • Setting of the individual alarm settings
- 46
- 47 • Setting of SVC:
  - 48 ○ level of ventilation, airway and lung mechanics as clinically indicated
  - 49 ○ ventilation regime: augmented ventilation
- 50
- 51 • Preoxygenation of the patient with an F<sub>I</sub>O<sub>2</sub>= 1 for at least 3 minutes
- 52
- 53
- 54
- 55
- 56
- 57
- 58
- 59
- 60

- Induction of the general anesthesia with an opioid (remifentanil, fentanyl or sufentanil) and propofol
- Hand bagging
- Insertion of the laryngeal mask or endotracheal tube
- Hand bagging while checking for significant leakage (laryngeal mask) and correction if needed
- Continuous infusion of remifentanil and propofol or administration of sevoflurane
- Start of SVC
- Insertion and position check of a gastric tube (if clinically indicated)
- Arterial blood gas analysis 15 minutes after the beginning of the surgical procedure (if clinically indicated)
- Stop of the continuous infusion of remifentanil and propofol (or sevoflurane) immediately after the end of the surgical procedure and switch SVC ventilation regime to "Recovery"

## II. Controlled mechanical ventilation

- Check of the anesthesia machine
- Setting of the individual alarm settings
- Setting of SVC
  - level of ventilation, airway and lung mechanics as clinically indicated
  - ventilation regime: controlled ventilation
- Preoxygenation of the patient with an  $F_{iO_2} = 1$  for at least 3 minutes
- Induction of the general anaesthesia with an opioid (remifentanil, fentanyl or sufentanil) and propofol
- Hand bagging

- Administration of muscle relaxant agent (rocuronium, cis-atracurium or succinylcholine) if needed
- Start of train-of-four (TOF) measurement (every 10 minutes)
- Insertion of the laryngeal mask or endotracheal tube
- Hand bagging while checking for significant leakage and correction if needed
- Continuous infusion of remifentanil and propofol or administration of sevoflurane
- Start of SVC
- Insertion and position check of a gastric tube (if clinically indicated)
- Arterial blood gas analysis 15 minutes after the begin of the surgical procedure (if clinically indicated)
- If TOF  $\geq 2$  stepwise decrease of remifentanil and propofol (or sevoflurane) with the aim to allow spontaneous breathing activity and switch the SVC system to “Augmented Ventilation”
- If no spontaneous breaths are detected during 20 minutes, the SVC system will be switched to “Encourage Spontaneous Breathing”
- Stop of the continuous infusion of remifentanil and propofol (or sevoflurane) immediately after the end of the surgical procedure and switch SVC ventilation regime to “Recovery”

### Extubation

Readiness for extubation is given when SVC proposes separation from the ventilator.

Extubation will be performed when the following criteria are satisfied: patient is awake and cooperative, sufficient airway protection or the Glasgow Coma Scale (GCS)  $>8$ , no surgical contraindication. After extubation, the patients will be monitored for at least 5 minutes in

1  
2  
3 the operating room (OR). The study period ends with the initiation of the patients' transfer  
4  
5 from the OR to the recovery room.  
6  
7

## 8 **Study Endpoints**

9  
10 Primary endpoint of the study is the frequency of adverse events (AE) defined as follows:

- 13 • Severe hypoventilation defined as minute volume lower than 40 ml/kg predicted  
14 body weight for longer than 5 minutes
- 18 • Apnea for longer than 90 seconds
- 20 • Hyperventilation defined as  $P_{et}CO_2$  lower than 5 mm Hg of the lower target setting  
21 for SVC for longer than 5 minutes. The responsible anesthesiologist defines a target  
22 for the arterial partial pressure of carbon dioxide ( $P_aCO_{2\_target}$ ) before the induction of  
23 the general anesthesia and sets the corresponding end-tidal  $CO_2$  range in the  
24 automated ventilation system. 15 minutes after the beginning of the surgical  
25 procedure, an arterial blood gas analysis may be performed and  $P_aCO_2$  will be  
26 measured.  
27
- 37 • Hypoventilation defined as  $P_{et}CO_2$  higher than 5 mm Hg of the upper target setting  
38 for the SVC for longer than 5 minutes
- 41 • Respiratory rate > 35 breaths per minute for longer than 5 minutes
- 44 • Any override or stop of the automated controlled ventilation settings by the  
45 anesthesiologist in charge if the settings are clinically not acceptable. Reasons for  
46 overriding or stopping the system will be noted.  
47  
48  
49

50  
51 Secondary endpoints are:

- 55 • Frequency of normoventilated, hypoventilated and hyperventilated patients. Patients  
56 will be classified as follows:  
57  
58

- hypoventilated patient:  $P_a\text{CO}_2 > (P_a\text{CO}_{2\_target} + 5 \text{ mm Hg})$
- hyperventilated patient:  $P_a\text{CO}_2 < (P_a\text{CO}_{2\_target} - 5 \text{ mm Hg})$
- normoventilated patient:  $(P_a\text{CO}_{2\_target} - 5 \text{ mm Hg}) \leq P_a\text{CO}_2 \leq P_a\text{CO}_{2\_target} + 5 \text{ mm Hg}$
- Time period between the switch from controlled to assisted ventilation and achievement of stable assisted ventilation of the patient
- Proportion of time within the target zones for  $V_T$  and  $P_{et}\text{CO}_2$  as individually set up for each patient by the user
- Frequency of alarms
- Frequency distribution of  $V_T$ ,  $P_{insp}$ ,  $T_I$ , expiration time and  $P_{et}\text{CO}_2$
- Number of re-intubations

## End-point determination

**The end-points of the study are evaluated using the recorded and protocolled data of the study team only during mechanical ventilation with activated SVC.**

### Data recording

After study inclusion the following demographic characteristics will be documented: patients' age, sex, height, weight, date and type of surgery. Beginning with the time of the study period, all available data from the ventilator will be recorded via the MEDIBUS interface. In detail, flow, pressure and expired  $\text{CO}_2$  will be stored every 8 ms ("fast data"), all ventilator settings, measurements and alarms will be stored at least every second ("slow data"). All SVC patient session journal files will be systematically stored. Heart rate,  $\text{SpO}_2$  and arterial blood pressures will be recorded at least every 5 minutes. In patients with a gastric tube, esophageal pressure swings will be recorded continuously ("fast data") until extubation. Data will be pseudonymized and then stored in a secured web space.

## Rules for early termination of the study

During each treatment of a patient in this study, the investigator can stop the study procedure when the ventilator settings controlled by SVC are clinically not appropriate or in case of a technical failure of the SVC system. The study will be terminated if the study procedure is stopped by the investigator (as described above) in 5 consecutive patients.

## Statistical considerations

We estimated a frequency of 3 to 5 % for the adverse events. Therefore, a sample size of  $n=100$  patients seems reasonable. Descriptive statistical analyses (mean  $\pm$  standard deviation, median and 95% confidence interval where appropriate) will be used.

## Ethics and dissemination

In contrast to conventional anesthesia machines, automated control of mechanical ventilation is steadily increasing in ICU ventilators. The commercially available systems cover the control of one ventilator setting, i.e. the pressure support level during weaning (SmartCare/PS)[2]), minute ventilation (mandatory minute ventilation, MMV[21], adaptive support ventilation, ASV [22-25]) or even all ventilatory settings (intellivent-ASV)[1]. SVC provides an automated control of minute ventilation by adapting  $T_I$ ,  $f_{\text{mech}}$ ,  $P_{\text{insp}}$ , and PS and supports spontaneous breathing activity as soon as possible by decreasing  $f_{\text{mech}}$  and by switching between pressure controlled and pressure support ventilation. It has been shown that the suppression of spontaneous breathing activity contributes to ventilator-induced lung injury [26], leads to ventilator-induced diaphragmatic dysfunction [27] and increases the risk of developing pneumonia when increasing ventilation time in ICU patients [28]. It is known that the induction of a general anesthesia leads to a cranial movement of the diaphragm provoking atelectasis [29]. Putensen et al. showed nicely that the early use of

1  
2  
3 assisted ventilation leads to recruitment of atelectatic lung regions and thereby improves  
4  
5 lung mechanics and gas exchange in patients at high risk of developing lung injury [30].  
6  
7 Therefore, an automated system that supports assisted ventilation as early as possible may  
8  
9 have beneficial effects like decreasing the frequency of pulmonary complications, the  
10  
11 amount of anesthesia and vasoactive drugs and recovery time. However, in this study with  
12  
13 the first SVC use in patients, we focus on the safety and efficacy of the system and assess the  
14  
15 feasibility of early assisted ventilation during general anesthesia in terms of a proof-of-  
16  
17 concept approach. In case that safety and efficacy are acceptable (i.e. the study was not  
18  
19 stopped per the early termination rule) in this study, a randomized controlled trial  
20  
21 comparing SVC with the usual practice may be warranted. As spontaneous breathing may  
22  
23 not be acceptable or possible during some surgical procedures (e. g. neuromuscular  
24  
25 blockade needed for the surgical procedure), we designed two different study scenarios  
26  
27 (early spontaneous breathing and controlled mechanical ventilation).  
28  
29  
30  
31  
32

33  
34 Regarding the study design one may argue that a prespecified list for overruling or  
35  
36 stopping the system may be provided to the study physicians. Such a list may prohibit  
37  
38 inaccurate overriding or stopping of SVC. From our point of view, it is the responsibility and  
39  
40 the ethical duty of the study physician to override the ventilatory settings provided by SVC or  
41  
42 even stop SVC for any safety reason. Should a list of possible reasons for overruling or  
43  
44 stopping be defined in the study protocol, the individual decision of the study physician  
45  
46 might be limited or influenced. Therefore, we decided not to provide such a list. We plan to  
47  
48 categorize reasons for overriding or stopping SVC after the completion of the whole study.  
49  
50  
51  
52  
53  
54  
55  
56  
57  
58  
59  
60

1  
2  
3 **A three-step dissemination strategy is planned as follows: first, the**  
4  
5 **study results will be presented at international anesthesia**  
6  
7 **conferences; second, the study will be published in a peer-reviewed**  
8  
9 **journal; third, a multicenter randomized controlled study will be**  
10  
11 **designed.**  
12  
13  
14  
15  
16  
17  
18  
19  
20  
21  
22  
23  
24  
25  
26  
27  
28  
29  
30  
31  
32  
33  
34  
35  
36  
37  
38  
39  
40  
41  
42  
43  
44  
45  
46  
47  
48  
49  
50  
51  
52  
53  
54  
55  
56  
57  
58  
59  
60

For peer review only



## References

1. Arnal JM, Wysocki M, Novotni D, et al. Safety and efficacy of a fully closed-loop control ventilation (IntelliVent-ASV(R)) in sedated ICU patients with acute respiratory failure: a prospective randomized crossover study. *Intensive Care Med* 2012;**38**(5):781-7.
2. Dojat M, Brochard L, Lemaire F, Harf A. A knowledge-based system for assisted ventilation of patients in intensive care units. *International journal of clinical monitoring and computing* 1992;**9**(4):239-50.
3. Sinderby C, Navalesi P, Beck J, et al. Neural control of mechanical ventilation in respiratory failure. *Nature medicine* 1999;**5**(12):1433-6.
4. Dojat M, Harf A, Touchard D, Laforest M, Lemaire F, Brochard L. Evaluation of a knowledge-based system providing ventilatory management and decision for extubation. *Am J Respir Crit Care Med* 1996;**153**(3):997-1004.
5. Lellouche F, Bouchard PA, Simard S, L'Her E, Wysocki M. Evaluation of fully automated ventilation: a randomized controlled study in post-cardiac surgery patients. *Intensive care medicine* 2013;**39**(3):463-71.
6. Burns KEA, Meade MO, Lessard MR, et al. Wean Earlier and Automatically with New Technology (the WEAN Study). A Multicenter, Pilot Randomized Controlled Trial. *American journal of respiratory and critical care medicine* 2013;**187**(11):1203-11.
7. Dongelmans DA, Veelo DP, Bindels A, et al. Determinants of tidal volumes with adaptive support ventilation: a multicenter observational study. *Anesth Analg* 2008;**107**(3):932-7.
8. Petter AH, Chiolerio RL, Cassina T, Chassot PG, Muller XM, Revely JP. Automatic "respirator/weaning" with adaptive support ventilation: the effect on duration of endotracheal intubation and patient management. *Anesth Analg* 2003;**97**(6):1743-50.

- 1  
2  
3 9. Rose L, Presneill JJ, Johnston L, Cade JF. A randomised, controlled trial of conventional  
4  
5 versus automated weaning from mechanical ventilation using SmartCare/PS.  
6  
7 Intensive Care Med 2008;**34**(10):1788-95.  
8  
9
- 10 10. Schädler D, Engel C, Elke G, et al. Automatic control of pressure support for ventilator  
11  
12 weaning in surgical intensive care patients. Am J Respir Crit Care Med  
13  
14 2012;**185**(6):637-44.  
15  
16
- 17 11. Stahl C, Dahmen G, Ziegler A, Muhl E. Comparison of automated protocol-based versus  
18  
19 non-protocol-based physician-directed weaning from mechanical ventilation.  
20  
21 Intensivmedizin und Notfallmedizin 2009;**46**(6):441-46.  
22  
23
- 24 12. Celli P, Privato E, Ianni S, et al. Adaptive support ventilation versus synchronized  
25  
26 intermittent mandatory ventilation with pressure support in weaning patients after  
27  
28 orthotopic liver transplantation. Transplant Proc 2014;**46**(7):2272-8.  
29  
30
- 31 13. Gruber PC, Gomersall CD, Leung P, et al. Randomized controlled trial comparing  
32  
33 adaptive-support ventilation with pressure-regulated volume-controlled ventilation  
34  
35 with automode in weaning patients after cardiac surgery. Anesthesiology  
36  
37 2008;**109**(1):81-7.  
38  
39
- 40 14. Kirakli C, Naz I, Ediboglu O, Tatar D, Budak A, Tellioglu E. A randomized controlled trial  
41  
42 comparing the ventilation duration between adaptive support ventilation and  
43  
44 pressure assist/control ventilation in medical patients in the ICU. Chest  
45  
46 2015;**147**(6):1503-9.  
47  
48
- 49 15. Kirakli C, Ozdemir I, Ucar ZZ, Cimen P, Kepil S, Ozkan SA. Adaptive support ventilation for  
50  
51 faster weaning in COPD: a randomised controlled trial. The European respiratory  
52  
53 journal : official journal of the European Society for Clinical Respiratory Physiology  
54  
55 2011;**38**(4):774-80.  
56  
57  
58  
59  
60

- 1  
2  
3 16. Lellouche F, Mancebo J, Jolliet P, et al. A multicenter randomized trial of computer-  
4  
5 driven protocolized weaning from mechanical ventilation. *Am J Respir Crit Care Med*  
6  
7 2006;**174**(8):894-900.  
8  
9
- 10 17. Sulzer CF, Chiolerio R, Chassot PG, Mueller XM, Revelly JP. Adaptive support ventilation  
11  
12 for fast tracheal extubation after cardiac surgery: a randomized controlled study.  
13  
14 *Anesthesiology* 2001;**95**(6):1339-45.  
15  
16
- 17 18. Zhu F, Gomersall CD, Ng SK, Underwood MJ, Lee A. A randomized controlled trial of  
18  
19 adaptive support ventilation mode to wean patients after fast-track cardiac valvular  
20  
21 surgery. *Anesthesiology* 2015;**122**(4):832-40.  
22  
23
- 24 19. Force ADT, Ranieri VM, Rubenfeld GD, et al. Acute respiratory distress syndrome: the  
25  
26 Berlin Definition. *JAMA : the journal of the American Medical Association*  
27  
28 2012;**307**(23):2526-33.  
29  
30
- 31 20. Global Initiative for chronic obstructive lung disease. Pocket guide to COPD diagnosis,  
32  
33 management and prevention. Secondary Global Initiative for chronic obstructive lung  
34  
35 disease. Pocket guide to COPD diagnosis, management and prevention. [website]  
36  
37 26.10.2015 2010.  
38  
39  
40 [http://www.goldcopd.org/uploads/users/files/GOLD\\_Pocket\\_2010Mar31.pdf](http://www.goldcopd.org/uploads/users/files/GOLD_Pocket_2010Mar31.pdf).  
41  
42
- 43 21. Hewlett AM, Platt AS, Terry VG. Mandatory minute volume. A new concept in weaning  
44  
45 from mechanical ventilation. *Anaesthesia* 1977;**32**(2):163-9.  
46  
47
- 48 22. Brunner JX, Iotti GA. Adaptive Support Ventilation (ASV). *Minerva Anesthesiol*  
49  
50 2002;**68**(5):365-68.  
51  
52
- 53 23. Campbell RS, Sinamban RP, Johannigman JA, et al. Clinical evaluation of a new closed  
54  
55 loop ventilation mode: adaptive supportive ventilation (ASV). *Critical Care*  
56  
57 1999;**3**(Suppl 1):P038.  
58  
59  
60

- 1  
2  
3 24. Tehrani FT. Jan. 22, 1991 1991. United States patent US Patent No. 4,986,268,.  
4  
5 25. Tehrani FT. Automatic control of an artificial respirator. Proc IEEE EMBS Conf 1991  
6  
7 1993;**13**:1738-39.  
8  
9  
10 26. Putensen C, Hering R, Wrigge H. Controlled versus assisted mechanical ventilation. Curr  
11  
12 Opin Crit Care 2002;**8**(1):51-7.  
13  
14 27. Levine S, Nguyen T, Taylor N, et al. Rapid disuse atrophy of diaphragm fibers in  
15  
16 mechanically ventilated humans. N Engl J Med 2008;**358**(13):1327-35.  
17  
18 28. Cook DJ, Walter SD, Cook RJ, et al. Incidence of and risk factors for ventilator-associated  
19  
20 pneumonia in critically ill patients. Ann Intern Med 1998;**129**(6):433-40.  
21  
22 29. Froese AB, Bryan AC. Effects of anesthesia and paralysis on diaphragmatic mechanics in  
23  
24 man. Anesthesiology 1974;**41**(3):242-55.  
25  
26  
27 30. Putensen C, Zech S, Wrigge H, et al. Long-term effects of spontaneous breathing during  
28  
29 ventilatory support in patients with acute lung injury. Am J Respir Crit Care Med  
30  
31 2001;**164**(1):43-9.  
32  
33  
34  
35  
36  
37

### Contributorship statement

38  
39 DS, GM, TB, IF, NW and CH substantially contributed to the conception and design of the  
40  
41 study. DS drafted the first version of the manuscript. DS, GM, TB, IF, NW and CH revised the  
42  
43 manuscript critically for important intellectual content and approved the final version of the  
44  
45 manuscript.  
46  
47  
48  
49  
50  
51  
52  
53  
54  
55  
56  
57  
58  
59  
60

## Funding

Drägerwerk AG & Co. KGaA, Lübeck, Germany provides a restricted research grant and one anesthesia machines equipped with Smart Vent Control for the conduction of the study to each of the participating study sites.

## Acknowledgement

The authors would like to thank Stefan Mersmann, Drägerwerk AG & Co. KGaA, Lübeck, Germany for excellent support especially in the description of the Smart Vent Control system.

## Competing interest

DS, TB, IF, NW and CH received lecture fees from Drägerwerk AG & Co. KGaA, Lübeck, Germany. DS received consultant honoraria from Drägerwerk AG & Co. KGaA, Lübeck, Germany.

1  
2  
3  
4  
5  
6  
7  
8  
9  
10  
11  
12  
13  
14  
15  
16  
17  
18  
19  
20  
21  
22  
23  
24  
25  
26  
27  
28  
29  
30  
31  
32  
33  
34  
35  
36  
37  
38  
39  
40  
41  
42  
43  
44  
45  
46  
47  
48  
49  
50  
51  
52  
53  
54  
55  
56  
57  
58  
59  
60

**Figure legend**

**Figure 1.** Flowchart of study procedure.

For peer review only

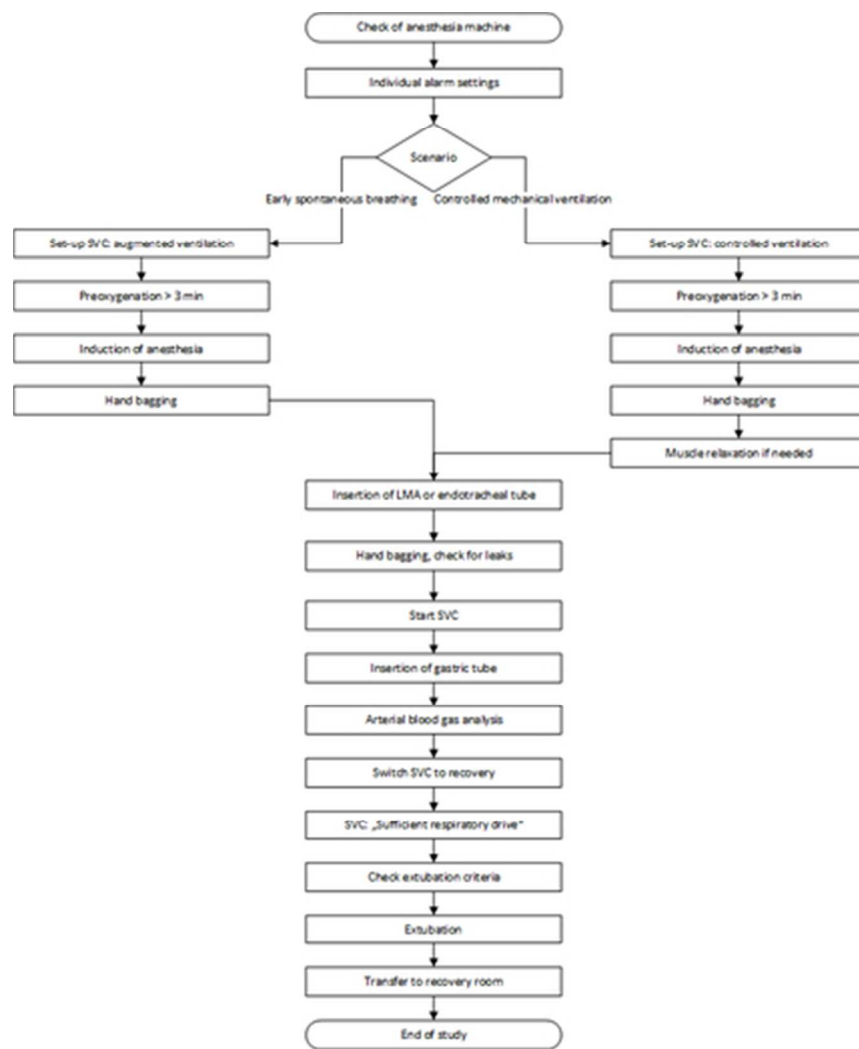

Figure 1. Flowchart of study procedure.

36x43mm (300 x 300 DPI)

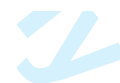

1  
2  
3  
4  
5  
6  
7  
8  
9  
10  
11  
12  
13  
14  
15  
16  
17  
18  
19  
20  
21  
22  
23  
24  
25  
26  
27  
28  
29  
30  
31  
32  
33  
34  
35  
36  
37  
38  
39  
40  
41  
42  
43  
44  
45  
46  
47  
48  
49  
50  
51  
52  
53  
54  
55  
56  
57  
58  
59  
60

# AVAS trial

Automated control of mechanical ventilation during general anaesthesia

A bicentric prospective observational trial

Study protocol



## General information

### *Principle investigators*

- I. Prof. Dr. med. Norbert Weiler  
University Medical Center Schleswig-Holstein, Campus Kiel  
Department of Anesthesiology and Intensive Care Medicine  
Arnold-Heller-Str. 3, Haus 12  
24105 Kiel  
Germany  
Tel.: +49 431 597-1025  
[norbert.weiler@uksh.de](mailto:norbert.weiler@uksh.de)
- II. Prim. Univ.-Prof. Dr. Christoph Hörmann  
State Hospital St. Pölten  
Anesthesiology and Intensive Care Medicine  
Propst-Führer-Straße 4  
3100 St. Pölten  
Austria  
Tel.: +43 2742/9004-11006  
Christoph.Hoermann@stpoelten.lknoe.at

### *Study team*

- I. **Kiel**  
Prof. Dr. Norbert Weiler (principal investigator)  
Dr. med. Dirk Schädler (deputy investigator)  
Dr. med. Tobias Becher (investigator)  
Stefanie D'aria (study nurse)  
Corinna Buchholz (study nurse)
- II. **St. Pölten**

Univ.-Prof. Dr. Christoph Hörmann (principal investigator)

Dr. med. Georg Miestinger (investigator)

### Summary

|                     |                                                                                                                                                                                                                                                                                                                                                                                                                                                                                                                                                                                                                                                                            |
|---------------------|----------------------------------------------------------------------------------------------------------------------------------------------------------------------------------------------------------------------------------------------------------------------------------------------------------------------------------------------------------------------------------------------------------------------------------------------------------------------------------------------------------------------------------------------------------------------------------------------------------------------------------------------------------------------------|
| Title               | Prospective, bicentric observational study to assess a novel system for automated control of mechanical ventilation (SmartCare/AVent) during general anesthesia                                                                                                                                                                                                                                                                                                                                                                                                                                                                                                            |
| Short title         | AVAS-trial                                                                                                                                                                                                                                                                                                                                                                                                                                                                                                                                                                                                                                                                 |
| Indication          | Patients under general anesthesia                                                                                                                                                                                                                                                                                                                                                                                                                                                                                                                                                                                                                                          |
| Design              | Prospective observational trial                                                                                                                                                                                                                                                                                                                                                                                                                                                                                                                                                                                                                                            |
| Primary endpoint    | <ul style="list-style-type: none"> <li>Number of adverse events</li> </ul>                                                                                                                                                                                                                                                                                                                                                                                                                                                                                                                                                                                                 |
| Secondary endpoints | <ul style="list-style-type: none"> <li>Number of normoventilated, hypoventilated and hyperventilated patients.</li> <li>Time period between switch from control to assisted ventilation and achievement of stable assisted ventilation of the patient</li> <li>Proportion of time within the target zones for tidal volume and PetCO<sub>2</sub> as individually set up for each patient by the user</li> <li>Number of alarms (anesthesia machine, SmartCare/AVent)</li> <li>Frequency distribution of tidal volume, inspiratory pressure, inspiration time, expiration time and PetCO<sub>2</sub>.</li> </ul>                                                            |
| Target population   | <p><b>Inclusion criteria</b></p> <ul style="list-style-type: none"> <li>Elective surgery of the upper limb, lower limb or, peripheral vascular surgery in general anesthesia without any additional regional anesthesia technique</li> <li>ASA I, II or III</li> <li>Age ≥ 18 years</li> <li>Written consent of the patient for study participation</li> </ul> <p><b>Exclusion criteria</b></p> <ul style="list-style-type: none"> <li>Mild, moderate or severe acute respiratory distress syndrome (ARDS)</li> <li>Known chronic obstructive pulmonary disease Gold stage III or higher</li> <li>Two or more acute organ failures</li> <li>Patient is pregnant</li> </ul> |
| Sample size         | n=100 (50 per center)                                                                                                                                                                                                                                                                                                                                                                                                                                                                                                                                                                                                                                                      |
| Intervention        | All patients will be mechanically ventilated with a novel automated mechanical ventilation system called SmartCare/AVent                                                                                                                                                                                                                                                                                                                                                                                                                                                                                                                                                   |
| Length of study     | Approximately 6 months                                                                                                                                                                                                                                                                                                                                                                                                                                                                                                                                                                                                                                                     |
| Sponsor             | None                                                                                                                                                                                                                                                                                                                                                                                                                                                                                                                                                                                                                                                                       |
| Registration        | <a href="https://clinicaltrials.gov/ct2/show/study/NCT02644005">clinicaltrials.gov ID NCT02644005</a>                                                                                                                                                                                                                                                                                                                                                                                                                                                                                                                                                                      |

## Rationale and background

Automated control of ventilator settings is a technology which is commonly used in ventilators used in the intensive care unit. Different systems (e. g. Intellivent-Adaptive support ventilation [1], SmartCare/PS [2], neurally adjusted ventilator assist [3]) were developed and commercially distributed. Most of the systems are available since many years and were studied intensely [4-9].

1  
2  
3  
4  
5  
6 During general anesthesia, the physician has to set-up the same ventilator settings as on an intensive  
7 care ventilator, however an automated control of ventilator settings is currently not available on  
8 anesthesia ventilators.  
9

10 The SmartCare/AVent option is an automated control of ventilator settings (mechanical breathing  
11 frequency, inspiratory pressure, pressure support, inspiratory time, trigger sensitivity) which is  
12 available as a software option on a Zeus anesthesia ventilator (Dräger Medical, Lübeck, Germany).  
13 The system is CE-certified and currently no study investigating this device in a clinical study was  
14 published.  
15  
16

17 SmartCare/AVent controls the ventilator settings with the aim to keep a patient stable in a zone of  
18 respiratory comfort. This zone is adoptable by the user for each individual patient and consists of  
19  
20

- 21 • Lower limit for tidal volume
- 22 • Upper limit for tidal volume
- 23 • Lower limit for endtidal carbon dioxide concentration
- 24 • Upper limit for endtidal carbon dioxide concentration
- 25
- 26

27 Based on these limits, the system derives new ventilator settings every 15 seconds and is able to  
28 change the ventilator mode from controlled mechanical ventilation (pressure controlled ventilation)  
29 to assisted ventilation (pressure support ventilation). The physician has always the opportunity to  
30 change manually the ventilator settings or to stop the system. If SmartCare/AVent detects  
31 spontaneous breathing activity, the mechanical breathing frequency will automatically be decreased  
32 with the aim to increase the portion of spontaneous ventilation. The patient will be continuously  
33 monitored for possible instabilities. Last, the physician will be supported in the recovery process of  
34 the general anesthesia by supporting the induction of spontaneous breathing and by checking  
35 whether the respiratory drive of the patient is sufficient for extubation.  
36  
37  
38  
39

40 SmartCare/AVent may have the following beneficial effects:  
41

- 42 • Improve efficacy and safety of mechanical ventilation during general anesthesia
- 43 • Increase the time period with assisted ventilation
- 44 • Decrease postoperative pulmonary complications
- 45 • Decrease the time needed for recovery of general anesthesia.
- 46
- 47
- 48

49 The purpose of this study is to describe the application of SmartCare/AVent in a clinical study and to  
50 assess its safety and efficacy.  
51  
52

## 53 Endpoints

### 54 *Primary endpoint*

- 55 • Frequency of adverse events (AE) defined as follows:
  - 56 ○ Severe Hypoventilation defined as minute volume lower than 40 ml/kg predicted
  - 57 ○ Apnea for longer than 90 seconds
  - 58
  - 59
  - 60

- 1
  - 2
  - 3
  - 4
  - 5
  - 6
  - 7
  - 8
  - 9
  - 10
  - 11
  - 12
  - 13
  - 14
  - 15
  - 16
  - 17
  - 18
  - 19
  - 20
  - 21
  - 22
  - 23
  - 24
  - 25
  - 26
  - 27
  - 28
  - 29
  - 30
  - 31
  - 32
  - 33
  - 34
  - 35
  - 36
  - 37
  - 38
  - 39
  - 40
  - 41
  - 42
  - 43
  - 44
  - 45
  - 46
  - 47
  - 48
  - 49
  - 50
  - 51
  - 52
  - 53
  - 54
  - 55
  - 56
  - 57
  - 58
  - 59
  - 60
- Hyperventilation defined as endtidal partial carbon dioxide pressure (PetCO<sub>2</sub>) lower than 5 mm Hg of the lower target setting for the SmartCare/AVent system for longer than 5 minutes. The responsible anesthesiologist defines a target for the arterial partial pressure of carbon dioxide (PaCO<sub>2\_target</sub>) before the induction of the general anesthesia and sets up the corresponding endtidal CO<sub>2</sub>-range in the automated ventilation system. 15 minutes after the beginning of the surgical procedure, an arterial blood gas analysis may be performed and the PaCO<sub>2</sub> will be measured.
  - Hypoventilation defined as PetCO<sub>2</sub> higher than 5 mm Hg of the upper target setting for the SmartCare/AVent system for longer than 5 minutes
  - Respiratory rate > 35 breaths per minute for longer than 5 minutes
  - Any override or stop of the automated controlled ventilation settings by the anesthesiologist in charge if the settings are clinically not acceptable. The reasons for overriding or stopping the system will be noted.

### Secondary endpoints

- Frequency of normoventilated, hypoventilated and hyperventilated patients. Patients will be classified as follows:
  - hypoventilated patient: PaCO<sub>2</sub> > (PaCO<sub>2\_target</sub>+5)
  - hyperventilated patient: PaCO<sub>2</sub> < (PaCO<sub>2\_target</sub>-5)
  - normoventilated patient: (PaCO<sub>2\_target</sub>-5) ≤ PaCO<sub>2</sub> ≤ PaCO<sub>2\_target</sub>+5
- Time period between switch from controlled ventilation to augmented ventilation and achievement of stable assisted ventilation of the patient
- Proportion of time within the target zones for tidal volume and PetCO<sub>2</sub> as individually set up for each patient by the user
- Frequency of alarms
- Frequency distribution of tidal volume, inspiratory pressure, inspiration time, expiration time and PetCO<sub>2</sub>
- Number of re-intubations

## Study description

### Study design

Prospective, observational study in two University Hospitals:

- I. University Medical Center Schleswig-Holstein, Campus Kiel  
Department of Anesthesiology and Intensive Care Medicine  
Arnold-Heller-Str. 3, Haus 12  
24105 Kiel  
Germany
- II. Karl Landsteiner Privat University

1  
2  
3  
4  
5  
6 University Hospital St. Pölten  
7 Department of Anesthesiology and Intensive Care Medicine  
8 Propst-Führer-Straße 4  
9 3100 St. Pölten  
10 Austria  
11

### 12 *Sample size*

13  
14 100 patients (50 patients per center).  
15

### 16 *Expected duration of the study*

17  
18 6 months.  
19  
20  
21

## 22 **Target population**

### 23 *Inclusion criteria*

24 All patients have to fulfill the following inclusion criteria:  
25

- 26 • Elective surgery of the upper limb, lower limb or peripheral vascular surgery in general  
27 anesthesia without any additional regional anesthesia technique
- 28 • Patient is classified as ASA I, II or III
- 29 • Age  $\geq$  18 years
- 30 • Written consent of the patient for study participation

### 31 *Exclusion criteria*

32 Patients are excluded when the following criteria are fulfilled:  
33

- 34 • Mild, moderate or severe acute respiratory distress syndrome (ARDS)[10]
- 35 • Known chronic obstructive pulmonary disease Gold stage III or higher
- 36 • Known neuro-muscular disease
- 37 • Two or more of the following acute organ failures
  - 38 ○ Hemodynamic instability: systolic blood pressure  $<$  90 mm Hg, mean arterial pressure  
39  $<$  70 mm Hg or administration of any vasoactive drugs.
  - 40 ○ Acute renal failure: oliguria (urine output  $<$  0.5 ml/kg/h for at least 2 hours despite of  
41 adequate management or creatinine increase  $>$  0.5 mg/dl
  - 42 ○ Cerebral failure: loose of consciousness or encephalopathy
- 43 • Patient is pregnant.

## 44 **Procedure of the study**

45 Patients will be screened for possible study inclusion during the premedication visit.  
46

### 47 *Ethics committee*

1  
2  
3  
4  
5  
6 The study will be started after approval of the local ethics committees.  
7

### 8 *Study consent*

9  
10 Patients have to give written informed consent for study inclusion during the premedication visit.  
11

### 12 *Intervention*

13  
14 All patients will be ventilated with the SmartCare/AVent system available on the ZEUS anesthesia  
15 machine (Dräger Medical Lübeck, Germany). The SmartCare/AVent system does not control the  
16 inspired fraction of oxygen ( $F_{iO_2}$ ) and positive end-expiratory pressure (PEEP). Therefore, the user  
17 has to set up both settings during the whole general anesthesia with the aim to reach  $SpO_2$  greater  
18 than 95%.  
19  
20

21  
22 Anesthesia will be performed by a physician of the study team who has been trained in using the  
23 SmartCare/AVent system. The physician can overrule or stop the system if this is necessary for  
24 patient safety. Reason for stopping or overruling will be documented.  
25

26  
27 Two different study scenarios are possible (according to the surgical procedure):  
28

- 29 I. Early spontaneous breathing: Patient is allowed to breathe spontaneously immediately after  
30 induction of the general anesthesia.
- 31 II. Controlled mechanical ventilation: Patients will be ventilated in a controlled ventilation  
32 mode as long as needed for the surgical procedure. Then, spontaneous breathing will be  
33 allowed as soon as possible.  
34  
35

36 The study will proceed as follows:  
37

#### 38 **I. Early spontaneous breathing**

- 39 • Check of the anesthesia machine
- 40 • Set up of the individual alarm settings
- 41 • Set up of the SmartCare/AVent system:
  - 42 ○ level of ventilation, airway and lung mechanics as clinically indicated
  - 43 ○ phase: augmented ventilation
- 44 • Preoxygenation of the patient with an  $F_{iO_2} = 1$  for at least 3 minutes
- 45 • Induction of the general anesthesia with an opioid (remifentanil, fentanyl or sufentanil)  
46 and propofol
- 47 • Hand bagging
- 48 • Insertion of the laryngeal mask or endotracheal tube
- 49 • Hand bagging while checking for significant leakage (laryngeal mask) and correction if  
50 needed
- 51 • Continuous infusion of remifentanil and propofol or administration of sevoflurane
- 52 • Start of SmartCare/AVent
- 53 • Insertion and position check of a gastric tube (if clinically indicated)
- 54 • Arterial blood gas analysis 15 minutes after the begin of the surgical procedure (if clinically  
55 indicated)  
56  
57  
58  
59  
60

- Stop of the continuous infusion of remifentanil and propofol (or sevoflurane) immediately after the end of the surgical procedure and switch the SmartCare/AVent system to “recovery”

## **II. Controlled mechanical ventilation**

- Check of the anaesthesia machine
- Set up of the individual alarm settings
- Set up of the SmartCare/AVent system
  - level of ventilation, airway and lung mechanics as clinically indicated
  - phase: controlled ventilation
- Preoxygenation of the patient with an  $F_{I}O_2 = 1$  for at least 3 minutes
- Induction of the general anaesthesia with an opioid (remifentanil, fentanyl or sufentanil) and propofol
- Hand bagging
- Administration of muscle relaxant agent (rocuronium, cis-atracurium or succinylcholine) if needed
- Start of train-of-four (TOF) measurement (every 10 minutes)
- Insertion of the laryngeal mask or endotracheal tube
- Hand bagging while checking for significant leakage and correction if needed
- Continuous infusion of remifentanil and propofol or administration of sevoflurane
- Start of SmartCare/AVent
- Insertion and position check of a gastric tube (if clinically indicated)
- Arterial blood gas analysis 15 minutes after the begin of the surgical procedure (if clinically indicated)
- If  $TOF \geq 2$  stepwise decrease of remifentanil and propofol (or sevoflurane) with the aim to allow spontaneous breathing activity and switch the SmartCare/AVent system to “Augmented Ventilation”
- If no spontaneous breaths will be detected during 20 minutes the SmartCare/AVent system will be switched to “Encourage Spontaneous Breathing”
- Stop of the continuous infusion of remifentanil and propofol (or sevoflurane) immediately after the end of the surgical procedure and switch the SmartCare/AVent system to “Recovery”

## **Extubation**

Readiness for extubation is given when SmartCare/AVent proposes separation from the ventilator.

Extubation will be performed when the following criteria are satisfied:

- Patient is awake and cooperative
- Sufficient airway protection or the Glasgow Coma Scale (GCS)  $>8$
- No surgical contraindication.

1  
2  
3  
4  
5  
6 After extubation, the patients will be monitored for at least 5 minutes in the operating room (OR).  
7

### 8 *End of study*

9  
10 The study period ends with the initiation of the patients' transfer from the OR to the recovery room.  
11

## 12 **Data recording**

13  
14 Beginning with the time of the study period all available data from the ventilator will be recorded via  
15 the MEDIBUS interface. In detail, flow, pressure and CO<sub>2</sub> values will be stored every 8 ms ("fast  
16 data"), all ventilator settings, measurements and alarms will be stored at least every second ("slow  
17 data"). All SmartCare/AVent patient session journal files will be systematically stored. Heart rate,  
18 SpO<sub>2</sub> and arterial blood pressures will be recorded at least every 5 minutes. In patients with a gastric  
19 tube, esophageal pressure swings will be recorded continuously ("fast data") until extubation. Data  
20 will be pseudonymized and then stored in a secured web space.  
21  
22  
23  
24  
25

## 26 **End-point determination**

### 27 28 29 30 **The end-points of the study are evaluated using the recorded and** 31 **protocolled data of the study team only during mechanical ventilation** 32 **with activated SVC.** 33 **Ethical and legal aspects**

34  
35 In this clinical study, a novel system for automated control of mechanical ventilation will be  
36 examined. The system adapts ventilator settings according to the actual clinical situation which may  
37 lead to a shorter time period of controlled ventilation. There is no increased risk for the studied  
38 patients. SmartCare/AVent bases on well-known and established ventilator modes. In case of a  
39 technical breakdown of SmartCare/AVent, the anesthesia ventilator will continue its work. During the  
40 whole study period, a specially trained physician of the study team is at the patient in the OR and  
41 conducts the study. He monitors the patient and SmartCare/AVent and is able to stop the system at  
42 any time.  
43  
44  
45

### 46 **Additional examinations**

47  
48 None.  
49

### 50 **Medical device**

51  
52 The SmartCare/AVent option and the anesthesia ventilator Zeus used in this study is CE-certified. A  
53 copy of the CE-certificate is available as appendix of this experimental protocol.  
54

### 55 **Patient information and informed consent**

56  
57 The study team (study nurses and study physicians) will screen consecutively for eligible patients the  
58 day before surgery. Possible study candidates will be informed about the study in detail and asked to  
59 give consent for study participation.  
60



## Patient assurance

All medical devices used in this study are CE-certified. Therefore, a patient assurance is not needed.

## Rules for early termination of the study

During each treatment of a patient in this study, the investigator is enabled to stop the study procedure when the ventilator settings controlled by the SmartCare/AVent system are clinically not appropriate or in case of a technical failure of the SmartCare/AVent system.

The study will be terminated if the study procedure was stopped by the investigator (as described above) in 5 consecutive patients.

## Statistical analysis

Descriptive statistical analyses (mean  $\pm$  standard deviation, median and 95% confidence interval where appropriate) will be used.

## References

1. **Arnal JM, Wysocki M, Novotni D, Demory D, Lopez R, Donati S, Granier I, Corno G, Durand-Gasselin J:** Safety and efficacy of a fully closed-loop control ventilation (IntelliVent-ASV(R)) in sedated ICU patients with acute respiratory failure: a prospective randomized crossover study. *Intensive Care Med* 2012;38:781-787.
2. **Dojat M, Brochard L, Lemaire F, Harf A:** A knowledge-based system for assisted ventilation of patients in intensive care units. *International journal of clinical monitoring and computing* 1992;9:239-250.
3. **Sinderby C, Navalesi P, Beck J, Skrobik Y, Comtois N, Friberg S, Gottfried SB, Lindstrom L:** Neural control of mechanical ventilation in respiratory failure. *Nature medicine* 1999;5:1433-1436.
4. **Burns KEA, Meade MO, Lessard MR, Hand L, Zhou Q, Keenan SP, Lellouche F:** Wean Earlier and Automatically with New Technology (the WEAN Study). A Multicenter, Pilot Randomized Controlled Trial. *Am J Respir Crit Care Med* 2013;187:1203-1211.
5. **Lellouche F, Mancebo J, Jolliet P, Roeseler J, Schortgen F, Dojat M, Cabello B, Bouadma L, Rodriguez P, Maggiore S *et al*:** A multicenter randomized trial of computer-driven protocolized weaning from mechanical ventilation. *Am J Respir Crit Care Med* 2006;174:894-900.
6. **Liu L, Xu XT, Yang Y, Huang YZ, Liu SQ, Qiu HB:** Computer-driven automated weaning reduces weaning duration in difficult-to-wean patients. *Chinese medical journal* 2013;126:1814-1818.
7. **Rose L, Presneill JJ, Johnston L, Cade JF:** A randomised, controlled trial of conventional versus automated weaning from mechanical ventilation using SmartCare/PS. *Intensive Care Med* 2008;34:1788-1795.
8. **Schädler D, Engel C, Elke G, Pulletz S, Haake N, Frerichs I, Zick G, Scholz J, Weiler N:** Automatic control of pressure support for ventilator weaning in surgical intensive care patients. *Am J Respir Crit Care Med* 2012;185:637-644.
9. **Stahl C, Dahmen G, Ziegler A, Muhl E:** Comparison of automated protocol-based versus non-protocol-based physician-directed weaning from mechanical ventilation. *Intensivmedizin und Notfallmedizin* 2009;46:441-446.
10. **Force ADT, Ranieri VM, Rubenfeld GD, Thompson BT, Ferguson ND, Caldwell E, Fan E, Camporota L, Slutsky AS:** Acute respiratory distress syndrome: the Berlin Definition. *Jama* 2012;307:2526-2533.

## Appendix

1. **Arnal JM, Wysocki M, Novotni D, Demory D, Lopez R, Donati S, Granier I, Corno G, Durand-Gasselín J:** Safety and efficacy of a fully closed-loop control ventilation (IntelliVent-ASV(R)) in sedated ICU patients with acute respiratory failure: a prospective randomized crossover study. *Intensive Care Med* 2012;38:781-787.
2. **Dojat M, Brochard L, Lemaire F, Harf A:** A knowledge-based system for assisted ventilation of patients in intensive care units. *International journal of clinical monitoring and computing* 1992;9:239-250.
3. **Sinderby C, Navalesi P, Beck J, Skrobik Y, Comtois N, Friberg S, Gottfried SB, Lindstrom L:** Neural control of mechanical ventilation in respiratory failure. *Nature medicine* 1999;5:1433-1436.
4. **Burns KEA, Meade MO, Lessard MR, Hand L, Zhou Q, Keenan SP, Lellouche F:** Wean Earlier and Automatically with New Technology (the WEAN Study). A Multicenter, Pilot Randomized Controlled Trial. *Am J Respir Crit Care Med* 2013;187:1203-1211.
5. **Lellouche F, Mancebo J, Jolliet P, Roeseler J, Schortgen F, Dojat M, Cabello B, Bouadma L, Rodriguez P, Maggiore S *et al*:** A multicenter randomized trial of computer-driven protocolized weaning from mechanical ventilation. *Am J Respir Crit Care Med* 2006;174:894-900.
6. **Liu L, Xu XT, Yang Y, Huang YZ, Liu SQ, Qiu HB:** Computer-driven automated weaning reduces weaning duration in difficult-to-wean patients. *Chinese medical journal* 2013;126:1814-1818.
7. **Rose L, Presneill JJ, Johnston L, Cade JF:** A randomised, controlled trial of conventional versus automated weaning from mechanical ventilation using SmartCare/PS. *Intensive Care Med* 2008;34:1788-1795.
8. **Schädler D, Engel C, Elke G, Pulletz S, Haake N, Frerichs I, Zick G, Scholz J, Weiler N:** Automatic control of pressure support for ventilator weaning in surgical intensive care patients. *Am J Respir Crit Care Med* 2012;185:637-644.
9. **Stahl C, Dahmen G, Ziegler A, Muhl E:** Comparison of automated protocol-based versus non-protocol-based physician-directed weaning from mechanical ventilation. *Intensivmedizin und Notfallmedizin* 2009;46:441-446.
10. **Force ADT, Ranieri VM, Rubenfeld GD, Thompson BT, Ferguson ND, Caldwell E, Fan E, Camporota L, Slutsky AS:** Acute respiratory distress syndrome: the Berlin Definition. *Jama* 2012;307:2526-2533.
